1 **Genomic analyses provide new insights into the evolutionary history**  
2 **and reproduction of the Paleogene relictual *Kingdonia***  
3 **(*Circaeasteraceae*, *Ranunculales*)**

4 Yanxia Sun<sup>1,2,9</sup>, Xu Zhang<sup>1,2,3,9</sup>, Aidi Zhang<sup>1,4,9</sup>, Jacob B. Landis<sup>5,6</sup>, Huajie Zhang<sup>1,2</sup>, Hang Sun<sup>7</sup>,  
5 Qiu-Yun (Jenny) Xiang<sup>8</sup>, Hengchang Wang<sup>1,2</sup>

6 <sup>1</sup>CAS Key Laboratory of Plant Germplasm Enhancement and Specialty Agriculture,  
7 Wuhan Botanical Garden, Chinese Academy of Sciences, Wuhan, Hubei, China

8 <sup>2</sup>Center of Conservation Biology, Core Botanical Gardens, Chinese Academy  
9 of Sciences, Wuhan, Hubei, China

10 <sup>3</sup>University of Chinese Academy of Sciences, Beijing 100049, China

11 <sup>4</sup>Center of Economic Botany, Core Botanical Gardens, Chinese Academy of  
12 Sciences, Wuhan, Hubei, China

13 <sup>5</sup>School of Integrative Plant Science, Section of Plant Biology and the L.H. Bailey  
14 Hortorium, Cornell University, Ithaca, NY, USA

15 <sup>6</sup>BTI Computational Biology Center, Boyce Thompson Institute, Ithaca, NY, USA

16 <sup>7</sup>Key Laboratory for Plant Diversity and Biogeography of East Asia, Kunming  
17 Institute of Botany, Chinese Academy of Sciences, Kunming, Yunnan, China

18 <sup>8</sup>Department of Plant and Microbial Biology, North Carolina State University, Raleigh NC, USA

19 <sup>9</sup>These authors contributed equally

20 Author for correspondence: Hang Sun, Email: sunhang@mail.kib.ac.cn; Jenny Xiang,

21 Jenny\_xiang@ncsu.edu; Hengchang Wang, Email: hcwang@wbcas.cn

22

## 23 **Abstract**

24 Asexual lineages are perceived to be short-lived on evolutionary timescales due to  
25 accumulation of deleterious mutations. Hence reports for exceptional cases of putative  
26 ‘ancient asexual’ species usually raise doubts about whether such species are recently  
27 derived or engage in some undocumented sexual reproduction. However, there have  
28 been few studies to solve the mystery. The monotypic *Kingdonia* dating to the early  
29 Eocene, contains only *K. uniflora* that has no known definitive evidence for sexual  
30 reproduction nor records for having closely related congeneric sexual species,  
31 seeming to have persisted under strict asexuality for long periods of time. In this study,  
32 we use population genomic analyses to test for reproduction mode and infer the  
33 evolutionary process and mechanisms facilitating the survival of the species. Our  
34 results indicate the presence of three differentiating genetic lineages within the species  
35 and support that asexual reproduction in *K. uniflora* indicated by high allelic  
36 heterozygosity had occurred prior to the lineage differentiation (~0.5 mya). We also  
37 detected DNA recombination events in some populations, in line with occurrence of  
38 unseen and unevenly distributed sexual reproduction among populations. However the  
39 observation of high linkage disequilibrium, relatively high ratio of  $\pi_N/\pi_S$   
40 (nonsynonymous versus synonymous nucleotide diversity), together with high allelic  
41 heterozygosity suggest the sexual reproduction is infrequent. Furthermore, we found  
42 that genes containing SNPs with elevated  $F_{st}$  values are significantly enriched in  
43 functions associated with seed development, suggesting differentiation in genes  
44 regulating seed development is likely to be the key reason of the uneven distribution

45 of sexual reproduction in *K. uniflora*. Evidence from our study supports predominate  
46 asexual reproduction in *K. uniflora*, but unseen sexual reproduction must have played  
47 a key role to ensure the long-term survival of the lineage in general. Uneven  
48 distribution of sexual reproduction in the species may be a key factor underlying the  
49 observed genetic differentiation between populations. This study provides novel  
50 insights into the reproduction and evolution of *Kingdonia*, a relict lineage evolved in  
51 the Paleogene and known for asexual reproduction, and demonstrate the power of data  
52 from population genome sequencing in resolving long-standing evolutionary  
53 questions.

54 **Key words:** asexual reproduction, allelic heterozygosity, DNA recombination,  
55 nonsynonymous nucleotide diversity, seed development.

56

57

## 58 **Introduction**

59 Sexual and asexual reproduction are the two basic methods of plant reproduction.  
60 Although sexual reproduction is the predominant mode in vascular plants, asexual  
61 reproduction occurs in many taxonomic groups (Mogie 1992). Compared to sexual  
62 reproduction, asexual reproduction is often described as “a short cut” and “cost  
63 effective”, requiring no waiting time and resources for fertilization to occur, resulting  
64 in production of more offspring in less time (Corley et al. 2001). Evolutionary theory  
65 predicts that asexual reproduction is not a successful long-term strategy. In the  
66 absence of sexual reproduction, accumulation of deleterious mutations, e.g., elevated

67 ratio of non-synonymous (selected) to synonymous (neutral) polymorphisms ( $\pi_N/\pi_S$ )  
68 is expected due to relaxed purifying selection in asexual lineages (Normark and  
69 Moran 2000; Ament-Velásquez et al. 2016). One consequence is the eventual  
70 extinction of asexual lineages once the accumulation reaches a high load of  
71 deleterious mutations (Muller's ratchet; Muller 1964; Felsenstein 1974). Hence,  
72 asexual lineages are traditionally perceived as evolutionary dead-ends  
73 (Maynard-Smith 1978; Zimmer 2009). However, a number of exceptions, the  
74 so-called 'ancient asexual' species, e.g., darwinulid ostracods and parthenogenetic  
75 oribatid mites, have been reported (Heethoff et al. 2007; Schoen et al. 2009; Brandt et  
76 al. 2021). These lineages were suggested to have persisted under obligate asexuality  
77 over millions of years, which violates the expectation that sexual reproduction and  
78 recombination are necessary for long-term survival (Schurko et al. 2009). A long  
79 standing hypothesis is that such 'ancient asexual' lineages should have special  
80 adaptive mechanisms, e.g., an efficient DNA repair system, to cope with the  
81 accumulation of deleterious mutations (e.g., Birky et al. 2005; Gladyshev and  
82 Meselson 2008). Alternatively, such lineages may not be true 'ancient asexuals', and  
83 several species (including the famous Bdelloid rotifers) previously believed to be  
84 long-term asexuals were indeed later shown to be either recently derived or to engage  
85 in some unseen sexual reproduction (Lunt 2008; Schurko et al. 2009; Signorovitch et  
86 al. 2015; Schwander 2016; Laine 2020; Brandt et al. 2021).

87 In the literature, the determination of obligate asexual reproduction in such 'ancient  
88 asexual' lineages has usually relied on negative evidence, such as the failure to find

89 individuals of the opposite sex for mating or failure to detect a recent sexual ancestor  
90 (Neiman et al. 2009). Such evidence is not conclusive regarding sexual reproduction  
91 is absent due to the possibility that unseen sexual reproduction may exist, and the  
92 apparent “obligate” asexuality might reflect our inability to observe sexual  
93 reproduction, making dominantly asexual lineages appear strictly asexual (Schurko et  
94 al. 2009). Hence, assessing the true mode of reproduction in putative ‘obligate asexual’  
95 species requires more reliable methods. In contrast to previous organismal-based  
96 methods, molecular approaches provide an effective way to distinguish obligate from  
97 facultative asexual lineages. There are a number of expected genetic consequences  
98 under obligate asexual reproduction. For example, in asexual diploid species, alleles  
99 are expected to highly divergent due to the independent accumulation of mutations in  
100 the absence of segregation and genetic exchange, the well-known Meselson effect  
101 (Birky 1996; Mark Welch and Meselson 2000). Highly divergent alleles are also  
102 expected in recently derived homoploid hybrid species due to the divergence of gene  
103 copies derived from different species (Beck et al. 2012; Jaron et al. 2021).  
104 Correspondingly, a negative value of the  $F_{IS}$  index, which measures the level of  
105 within-individual heterozygosity, is expected in these lineages, as observed in obligate  
106 asexuals (Balloux et al. 2003; Ament-Velásquez et al. 2016). Another  
107 well-acknowledged signature of asexual reproduction is the generation of non-random  
108 associations between loci, i.e., linkage disequilibrium (LD), which is often used for  
109 estimating the amount of asexual reproduction. Therefore, genome-wide linkage  
110 disequilibrium is expected in obligate asexuality (de Meeûsa and Balloux 2004;

111 Henry et al. 2012; Lovell et al. 2014). Additionally, in a strictly asexual lineage,  
112 where mutation is the only source of genetic novelty and all loci show complete  
113 linkage, the genealogy of genes and genomes of the lineage are expected to be a  
114 strictly branching tree rather than a network (Normark et al. 2003). Although some of  
115 these genetic consequences related to asexual reproduction have been assessed in  
116 animals, investigating all of these consequences in a single study has been rare, and  
117 largely lacking in plant lineages appears to be asexual only. .

118 *Kingdonia*, represented by a single species *K. uniflora*, is one of two monotypic  
119 genera (*Kingdonia* and *Circaeaster*) in the family Circaeasteraceae (Ranunculales;  
120 Angiosperm Phylogeny Group, 2016). The genus represents an ancient lineage  
121 estimated to have diverged from its sister *Circaeaster agrestis* Maxim. during the  
122 early Eocene based on molecular dating using the DNA sequences of three chloroplast  
123 spacers (52 mya; 95% HPD=27-75 mya), 497 single-copy genes (51.8 mya; 95%  
124 HPD=31-76 mya) and whole plastome sequences (52.2 mya; 95% HPD=26-83 mya),  
125 respectively (Ruiz-Sanchez et al. 2012; Sun et al. 2020; Zhang et al. 2020). Unique  
126 among angiosperms, both *K. uniflora* and *C. agrestis* possess an unusual dichotomous  
127 leaf venation similar to that of ferns and *Ginkgo*, indicating a reversal to an ancestral  
128 venation type of vascular plants. *Kingdonia uniflora* (diploid,  $2n = 18$ ) is a herbaceous  
129 species with a genome size of ~ 1 Gb, endemic to alpine regions of southwest China  
130 and grows in cold and humid habitats with deep humus (Sun et al. 2020). The species  
131 has a very narrow distribution being restricted to the Qinling Mountains, Minshan  
132 Mountains and Daxue-Qionglai Mountains (Fig. 1a). Notably, *K. uniflora* is

133 well-known to produce new “individuals” by means of rhizome rupture, which occurs  
134 on rhizomes more than three years old (Lei et al. 2000; Li et al. 2003; Supplemental  
135 Fig. S1). Although production of seeds was observed occasionally, but different from  
136 its sexual sister species *C. agrestis*, the seed embryo of *K. uniflora* can only develop  
137 to the torpedo stage (Ren et al. 1998). Efforts to germinate *K. uniflora* seeds in the  
138 natural habitat and lab had a zero rate of success (Li et al. 2004). So far, field  
139 investigations throughout the species’ range found no seedlings of the species in  
140 natural populations (Li et al. 2003; Xu 2015). Available evidence suggests that the  
141 species may have evolved without sexual reproduction for long periods of time,  
142 representing a putative ‘ancient asexual’ lineage. Here we characterize genome-wide  
143 genetic variation across nearly all known *K. uniflora* populations. Specifically, we aim  
144 to determine (1) if the species is indeed an obligate asexual lineage or cryptic sexual  
145 reproduction is present, and (2) when asexual reproduction has evolved in the species.  
146 To answer these questions and better understand the evolutionary mechanisms of the  
147 species, we conducted various analyses to (a) characterize the genetic variation and  
148 population structure, (b) examine the genomic signatures of reproductive strategies, (c)  
149 reconstruct the demographic and evolution histories, and (d) identify and annotate  
150 outlier genetic variants.

151

152

## 153 **Results**

### 154 **Sequence data processing**

155 We produced 1601 Gb of data containing 2,356,880,312 raw reads for 60 individuals  
156 of *K. uniflora*, and 2,342,304,596 clean reads (SRA-----) after filtering. The depth of  
157 coverage for the 60 samples ranged from 21.6× (WZ4) to 34.8× (TN1), with a mean  
158 coverage of 26.6x (Supplemental Table S1). Using the *K. uniflora* reference genome  
159 (GenBank: PRJNA587615, Sun et al. 2020), we obtained 9,349,354 raw SNPs, and  
160 8,678,779 high quality SNPs after primary standard strict filtering. Additionally, by  
161 applying deep filtering standards, we obtained 114,746 SNPs located in 960 contigs  
162 (Supplemental Table S2).

163

#### 164 **Genetic diversity and population structure**

165 Our LEA (Landscape and Ecological Association) analysis with the cross-entropy  
166 method failed to identify an ideal best-fit number of  $K$  (Supplemental Fig. S2).  
167 However, our phylogenetic analysis using the SVDQuartets method (Chifman and  
168 Kubatko 2014) revealed three clusters (supported by three quarters (361494/487635)  
169 of all the quartets), corresponding to the QL (Qingling Mountains), MS (Minshan  
170 Mountains) and DQ (Daxue-Qionglai Mountains) groups (Fig. 1c). Therefore, we  
171 repeated the LEA analysis (Fig. 1b; Supplemental Fig. S3) by setting  $K=3$ . The result  
172 recognized the same three groups identified by SVDQuartets. Additionally, two of the  
173 three populations from the QL group, three of the five populations from the MS group,  
174 and two of the four populations from the DQ group exhibit different levels of genetic  
175 admixture with the other groups (Fig. 1a,1b).

176 Nucleotide diversity ( $\pi$ ) (the average  $\pi$  value) or per-site heterozygosity analysis



177 showed that the three groups have similar genetic diversity, ranging from  $1.359 \times 10^{-3}$   
178 to  $1.497 \times 10^{-3}$  (Table 1; Fig. 1d). The genetic differentiation statistics (fixation index;  
179  $F_{ST}$ ) among the three groups estimated from VCFtools v0.1.16 (Danecek et al. 2011)  
180 was 0.136 between the non-adjacent QL and the DQ groups (highest), 0.086 between  
181 the adjacent MS group and DQ group (lowest), and 0.0104 between the adjacent  
182 groups MS and QL (Fig. 1d), indicating low genetic differentiation among the three  
183 groups. The Mantel test showed significant isolation by distance (IBD) ( $r = 0.468$ ,  $P =$   
184  $0.0002$ ) (Fig. 1e). Results from the AMOVA showed small genetic variation among  
185 the three groups (5.6%; Table 2). The results also showed no significant amount of  
186 variation among individuals within populations (with a negative component value of  
187 -48%; Table 2). And most of the genetic variation in *K. uniflora* was explained by  
188 variation within individuals (with a component value of 123.83% within individuals)  
189 (Table 2).

190

191 **Table 1.** Summary of genetic diversity of *K. uniflora* calculated using 114,746 variant positions.

| Group IDs | Population IDs | $n$       | $\pi$ ( $10^{-3}$ ) |
|-----------|----------------|-----------|---------------------|
| <b>QL</b> |                | <b>15</b> | <b>1.359</b>        |
|           | FP             | 5         | 1.592               |
|           | TB             | 5         | 1.466               |
|           | TN             | 5         | 1.696               |
| <b>MS</b> |                |           | <b>1.457</b>        |
|           | AX             | 5         | 1.771               |

---

|           |     |   |              |
|-----------|-----|---|--------------|
|           | HS  | 5 | 1.648        |
|           | JZG | 5 | 1.602        |
|           | WZ  | 5 | 1.870        |
|           | ZQ  | 5 | 1.715        |
| <b>DQ</b> |     |   | <b>1.497</b> |
|           | EM  | 5 | 1.867        |
|           | HLG | 5 | 1.755        |
|           | MB  | 5 | 1.686        |
|           | WL  | 5 | 1.625        |

---

192  $n$ , number of individuals sampled;  $\pi$ , average number of pairwise nucleotide differences per site.

193 The statistics of three defined groups are given in bold.

194

195 **Table 2.** Details on the results of the analysis of the molecular variance (AMOVA).

---

| Source of variation | Sum of squares | of Variance components | Percentage variation | Fixation indices | <i>P</i> -values |
|---------------------|----------------|------------------------|----------------------|------------------|------------------|
| Among groups        | 166030.43      | 993.35                 | 5.06                 | 0.05             | <b>0.00</b>      |
| Among populations   | 396979.34      | 3879.21                | 19.76                | 0.21             | <b>0.00</b>      |
| within groups       |                |                        |                      |                  |                  |
| Among individuals   | 255202.00      | -9443.63               | -48.10               | -0.64            | 1.00             |
| within populations  |                |                        |                      |                  |                  |
| Within individuals  | 1452238.00     | 24203.97               | 123.28               | -0.23            | 1.00             |

---

196 Significant *P*-values are in bold.

(a)

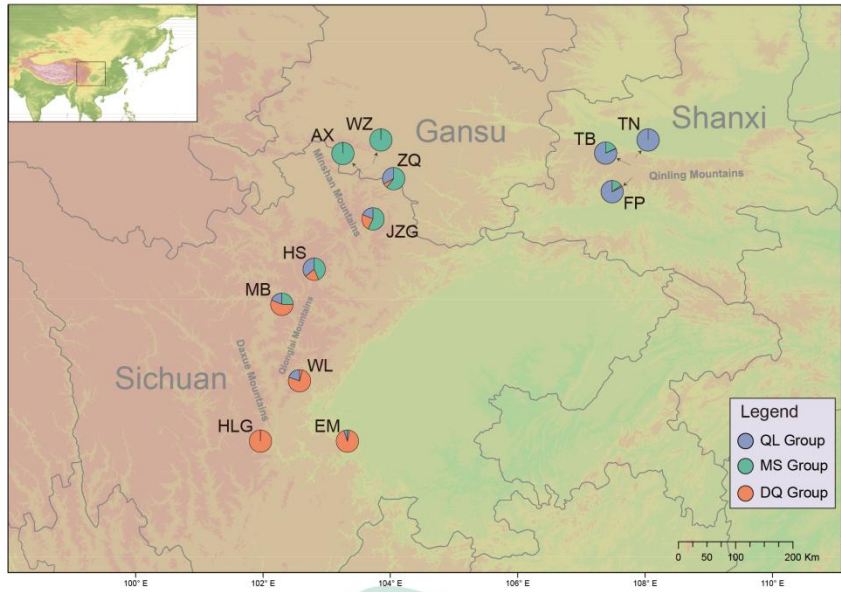

(b)

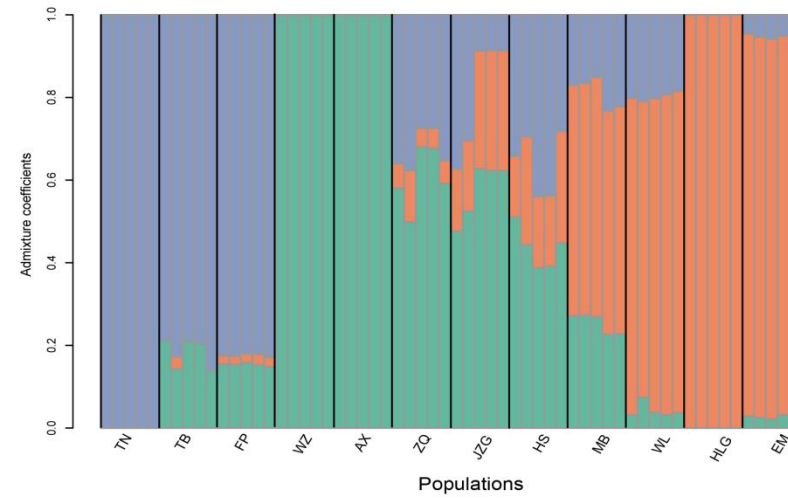

(c)

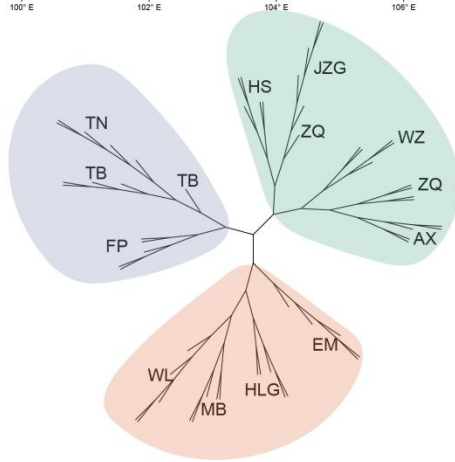

(d)

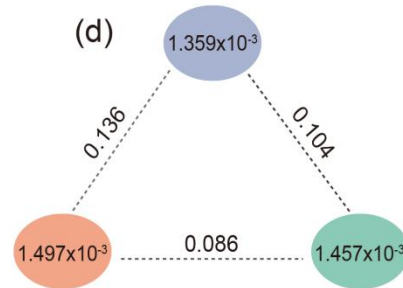

(e)

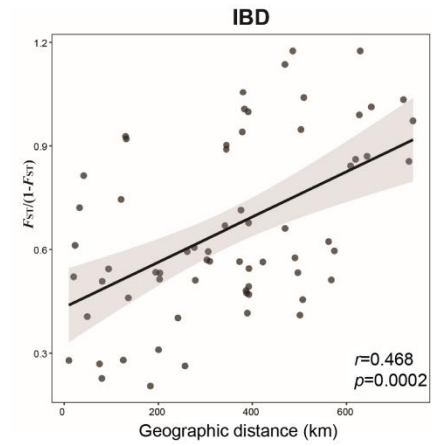

198 Fig. 1 Genetic structure and diversity within *K. uniflora*. (a) Sampling sites and genetic structure detected by LEA analysis ( $K = 3$  populations) mapped using ArcGIS  
 199 v10.3. The genetic QL group is shown in blue, the MS group is shown in green, and the DQ group is shown in orange. (b) Genetic groups of *K. uniflora* inferred by  
 200 the LEA analysis when setting  $K=3$ . (c) A phylogeny derived from SVDQuartets using 114,746 SNPs. (d) Nucleotide diversity ( $\pi$ ) and population divergence ( $F_{ST}$ )  
 201 across three genetic groups. The value in each circle represents a measure of nucleotide diversity for this group, and the value on each line indicates divergence  
 202 between groups. (e) Correlation between genetic distance and geographical distance (isolation by distance, IBD), as tested by Mantel test.  
 203

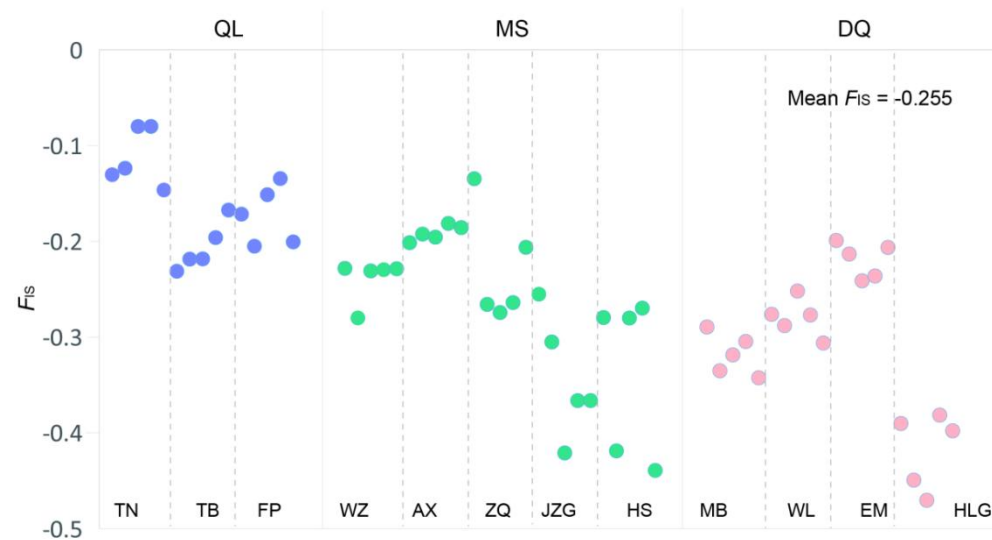

204

205 Fig. 2 Distribution of values of inbreeding coefficient ( $F_{IS}$ ). Under Hardy-Weinberg equilibrium  $F_{IS}$  is 0, negative values of  $F_{IS}$  indicate excess of individual  
206 heterozygosity.

207 **Genomic signatures and signs of sexual and asexual reproduction**

208 The calculation of  $F_{IS}$  using VCFtools v0.1.16 (Danecek et al. 2011) revealed negative  
209  $F_{IS}$  values (ranging from -0.07 to -0.47) for all 60 *K. uniflora* individuals (mean  
210  $F_{IS}=-0.26$ ) (Fig. 2), indicating greater observed individual heterozygosity  
211 (Supplemental Table S3) than expected from random mating, a sign of asexual  
212 reproduction. The site frequency spectrum (SFS) across all 12 populations showed  
213 sites with heterozygous SNPs shared among three lineages/all 12 populations were  
214 most abundant (12,367 sites), *c.* 250 times more frequent than expected under  
215 Hardy-Weinberg equilibrium (HWE) (purple bar in Fig. 3), suggesting a large  
216 proportion of the observed excess individual heterozygosity in the 12 populations  
217 were attributed to accumulation by asexuality prior to the evolutionary divergence of  
218 the three genetic lineages (QL, MS and DQ).  
219

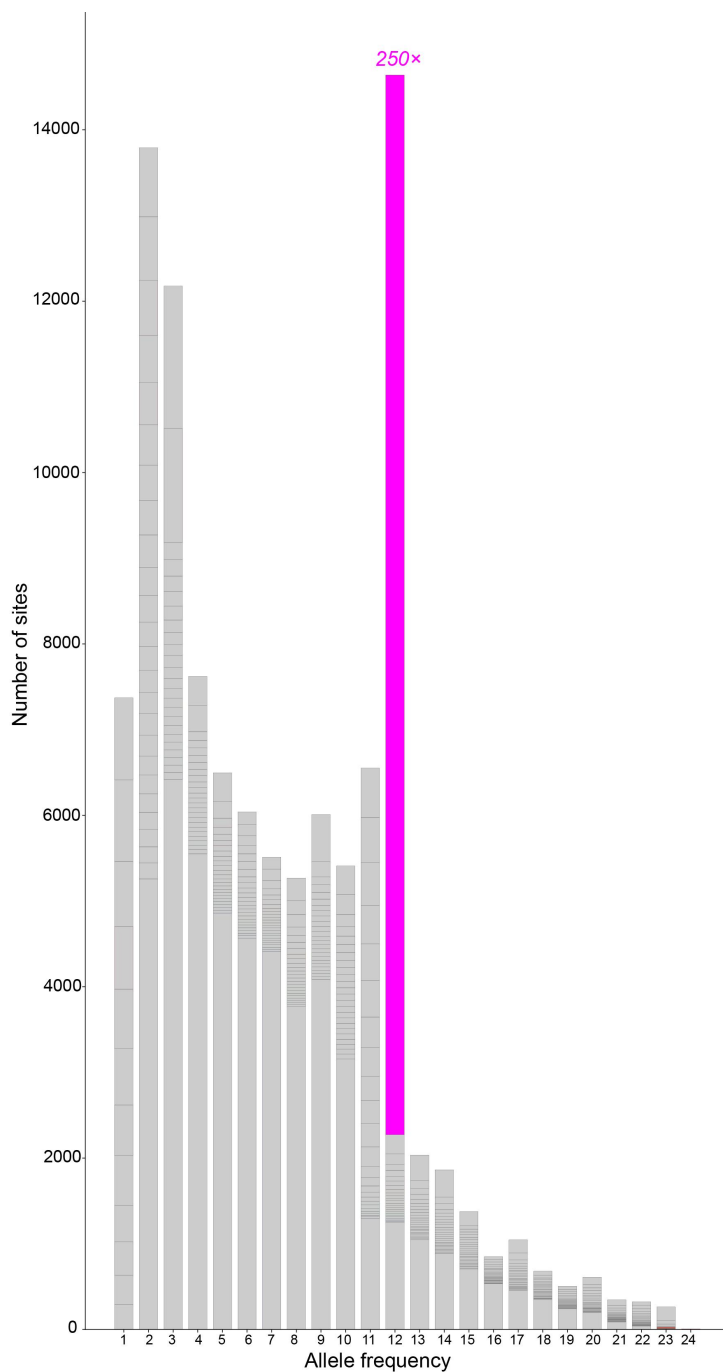

220

221 Fig. 3 The site frequency spectrum (SFS) depicting the number of sites with different allele  
222 frequency across 12 *K. uniflora* individuals (one allele can display a maximum frequency of 24  
223 among 12 diploid individuals). Heterozygous genotypes shared among all 12 populations are  
224 highlighted using the purple color and its excess over HWE indicated (*c.* 250 times as frequent as  
225 expected under HWE).

226

227 Result from Linkage Disequilibrium (LD) analyses showed sites within 0-25 kb  
228 region had an average  $r^2$  of 0.60, 0.50 and 0.50, which slowly decay to *c.* 0.50, 0.40  
229 and 0.40 after a physical distance of 300 kb in QL, MS and DQ, respectively (Fig. 4),  
230 implying very slow LD decay over very large distance. In addition, the LD analysis  
231 between pairs of SNPs up to 1000 kb obtained similar results (Fig. S4).

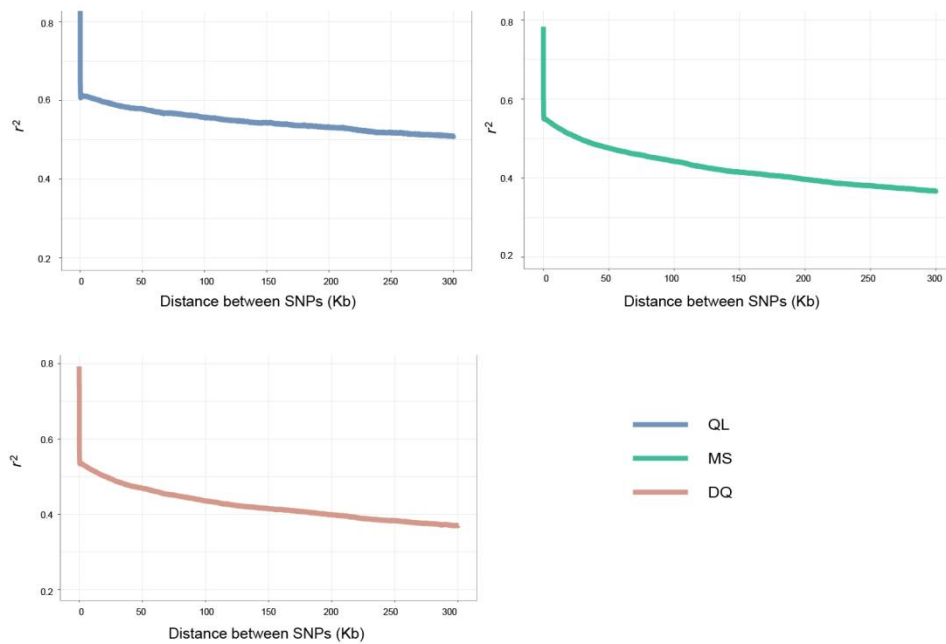

232  
233 Fig. 4 Decay of linkage disequilibrium (LD) with physical distance in three genetic groups of  
234 *Kingdonia uniflora*. Averages of pairwise linkage disequilibrium measures  $r^2$  are plotted for each  
235 bin of distances between pairs of SNPs. The displayed data are for the bins with pairs of SNPs  
236 separated by  $\leq 300$  kb

237  
238 We used the ratio of nonsynonymous to synonymous polymorphisms ( $\pi_N/\pi_S$ ) to  
239 assess the efficiency of purifying selection in *K. uniflora*. We defined a total of 24  
240 genotypic groups according to multidimensional scaling (MDS) clustering (Fig. 5a).  
241 Among the 24 genotypic groups, genetic diversity at zero-fold degenerate



242 (nonsynonymous) and four-fold degenerate (synonymous) sites ( $\pi_0$  and  $\pi_4$ ) is 0.000546

243 and 0.000992, respectively, resulting in  $\pi_0/\pi_4$  ( $\pi_N/\pi_S$ )=0.55 (Fig. 5b).

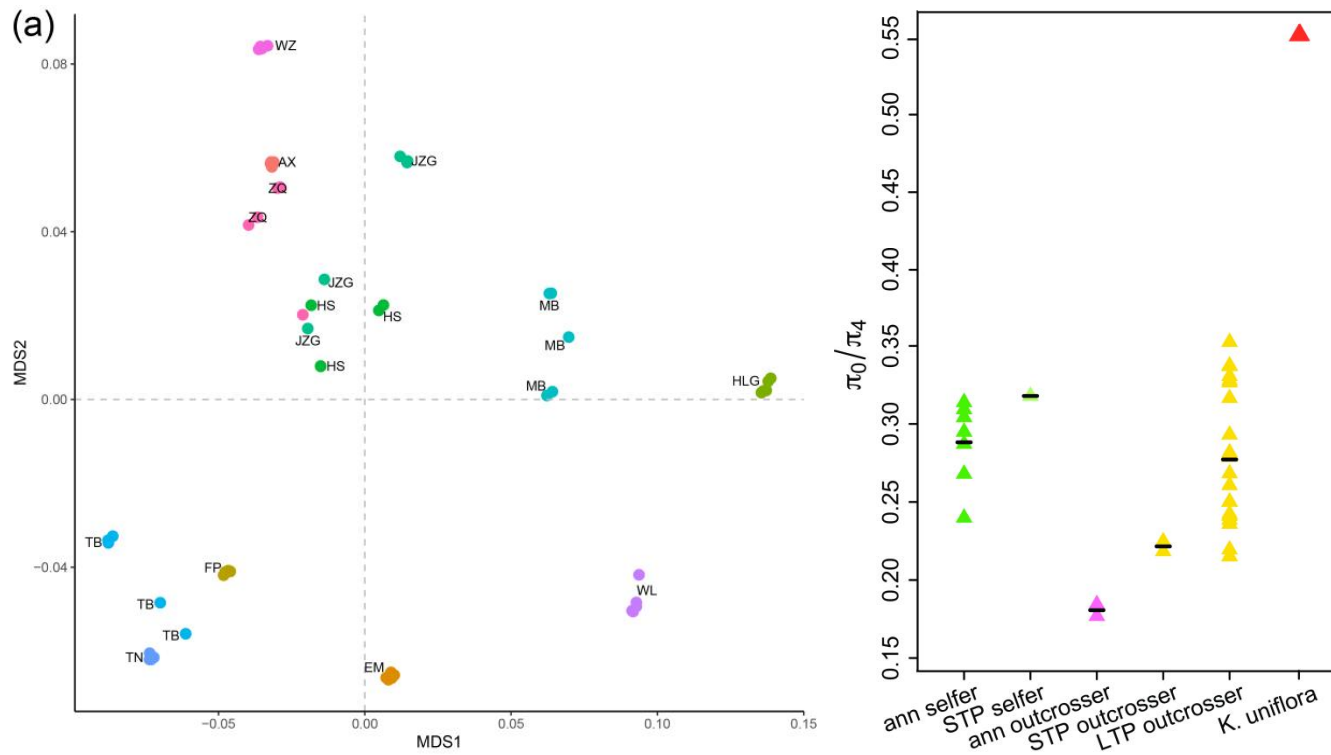

244

245 Fig. 5 Calculation of  $\pi_N/\pi_S$  in *K. uniflora*. (a) Multidimensional scaling analysis of identity-by-state pairwise distances between individuals. Individuals in the same  
 246 population are coded with the same color. Individuals that come from the same population and cluster together are grouped into one genotypic group, and a total of  
 247 24 genotypic groups are identified. (b)  $\pi_0/\pi_4$  difference between *K. uniflora* and other plants reported in Chen et al. (2017). The figure is modified based on Fig. 2B in  
 248 Chen et al. (2017). STP, short-term perennial; LTP, long-term perennial.

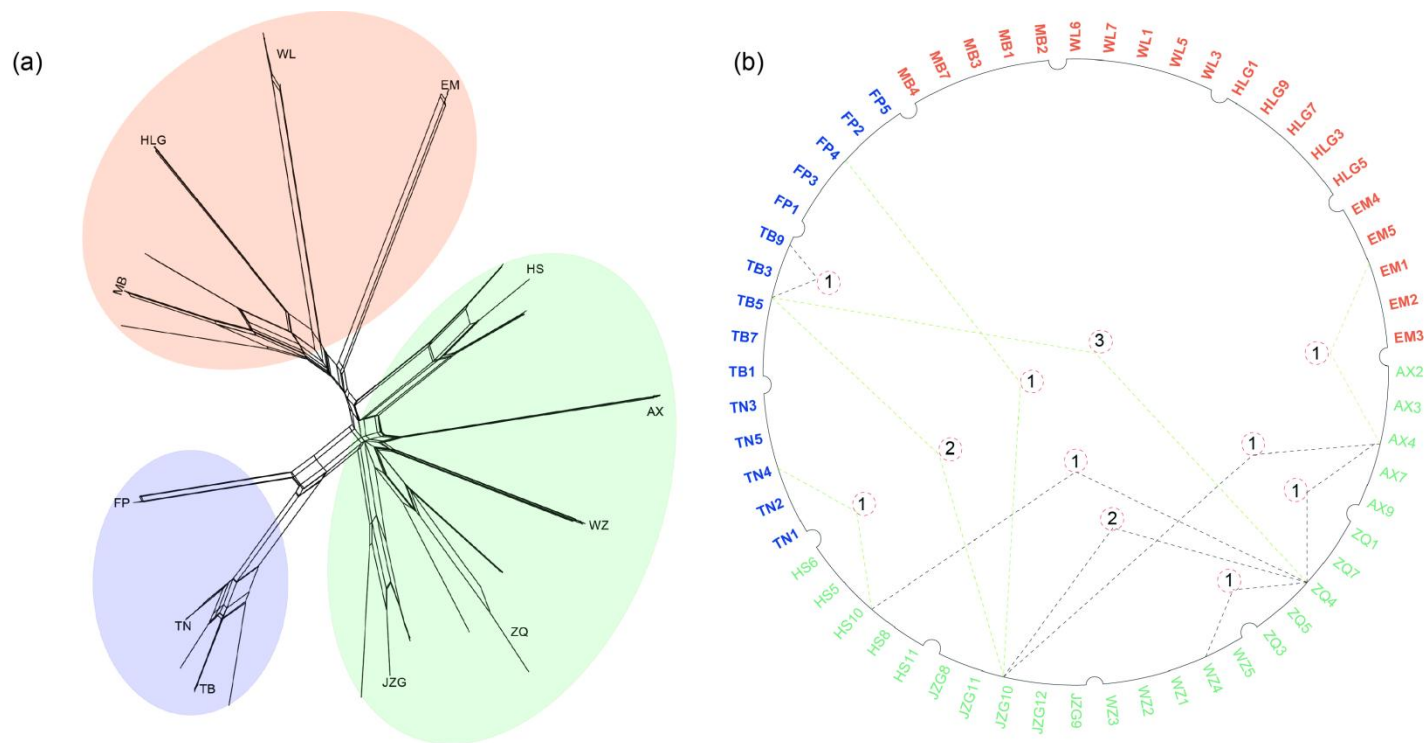

249

250 Fig. 6 Recombination events detected in *Kingdonia uniflora* (a) Recombination events identified by SplitsTree phylogenetic networks using a total of 114,476 SNPs .

251 The closed loops in the network shows recombination events. (b) Recombination events identified by RDP4. Black dotted lines indicate recombination between

252 different individuals in the same genetic group; green dotted lines represent recombination between different individuals from different genetic groups; the number of

253 corresponding DNA recombination events are indicated in circles.

254 Results from SplitsTree v4.13.1 (Huson and Bryant 2006) showed reticulations on  
255 the phylogeny of *K. uniflora*, which are signals of recombination (Fig. 6a). When all  
256 SNPs were concatenated into a single sequence, the RDP4 (Recombination Detection  
257 Program 4) (Martin et al. 2015) analysis identified 15 recombination events that were  
258 unevenly distributed among populations (Supplemental Table S4; Fig. 6b).

259

### 260 **Inferring population demographic history and distributions**

261 The model with the highest score found by simulations of demographic history using  
262 FSC2 (*fastsimcoal2*) (Excoffier et al. 2013) showed a divergence between the DQ and  
263 QL + MS groups 513,000 years ago and a divergence between the MS and QL groups  
264 37,800 years ago (Table 3; Fig. 7a). The population sizes of DQ, MS and QL were  
265 estimated to be 98,800, 32,300 and 23,200, respectively (Table 3; Fig. 7a). The  
266 ancestral effective population size of the species ( $N_{A1}$ ; Fig. 7a) was estimated to be  
267 29,000 (Table 3), slightly larger than that of QL, but smaller than those of DQ and MS  
268 (Table 3; Fig. 7a). The model also indicates asymmetric gene flow among the three  
269 genetic groups, with the rates of migration from QL to DQ and MS being higher than  
270 in the reverse direction. Between DQ and MS, the rate of migration from MS to DQ is  
271 higher than in the opposite direction (Table 3).

272 Results from MAXENT ENM (ecological niche modeling) (Phillips and Dudik  
273 2008) analyses showed a greater suitable habitat for *K. uniflora* in the LGM than at  
274 present, especially in the Hengdian Mountains region, and that there is more suitable  
275 habitat at present than is currently occupied (Fig. 7b).

276

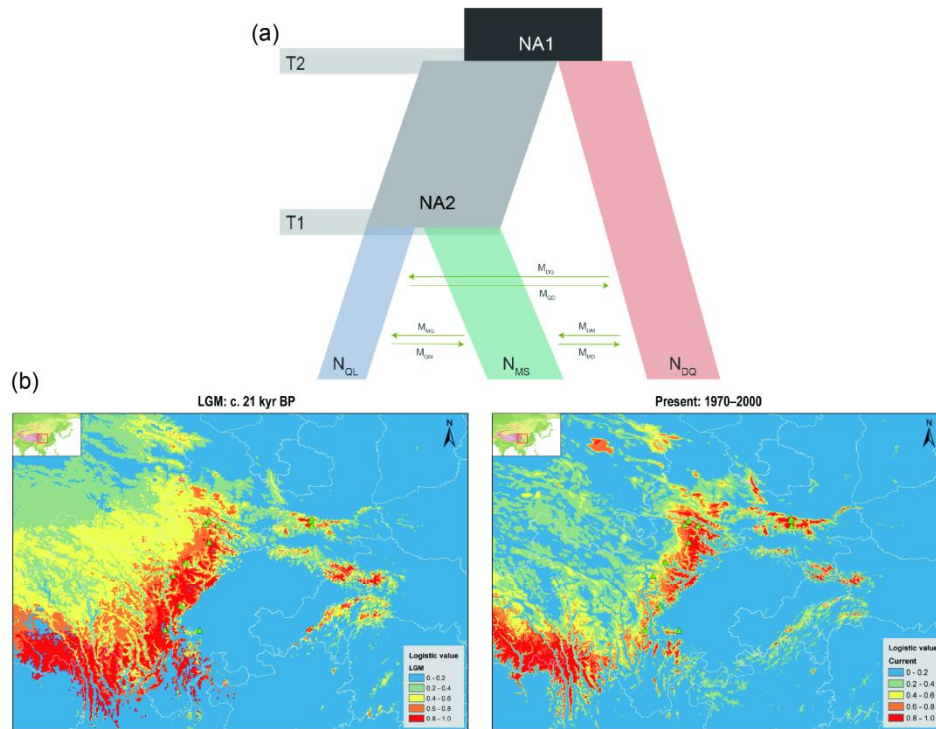

277

278 Fig. 7 Inferred evolutionary history of *K. uniflora*. (a) Schematic of demographic scenarios  
 279 modeled using FSC2, with the ancestral population shown in gray. Column width represents the  
 280 relative effective population size. Arrows indicate gene flow between populations. (b) Predicted  
 281 suitable distributions of *K. uniflora* at different historical periods based on species distribution  
 282 modeling (SDM). Area color indicates probability (0-1) of suitable habitat for *K. uniflora*. LGM,  
 283 last glacial maximum. The map image was derived from ArcGIS v10.3.

284

285 **Table 3.** Inferred demographic parameters for the best-fitting FSC2 model shown in Figure 7a,  
 286 including 95% confidence intervals.

| Parameter      | Point estimation | 95% confidence intervals |             |
|----------------|------------------|--------------------------|-------------|
|                |                  | Lower bound              | Upper bound |
| T <sub>1</sub> | 3.78E+04         | 2.65E+04                 | 4.91E+04    |

---

|          |          |          |          |
|----------|----------|----------|----------|
| $T_2$    | 5.13E+05 | 4.60E+05 | 5.65E+05 |
| $N_{A1}$ | 2.90E+04 | 2.46E+04 | 3.33E+04 |
| $N_{A2}$ | 1.08E+05 | 1.00E+05 | 1.15E+05 |
| $N_{DQ}$ | 9.88E+04 | 6.58E+04 | 1.32E+05 |
| $N_{MS}$ | 3.23E+04 | 2.74E+04 | 3.71E+04 |
| $N_{QL}$ | 2.32E+04 | 3.55E+03 | 4.29E+04 |
| $M_{DM}$ | 2.30E-04 | 9.76E-05 | 3.63E-04 |
| $M_{DQ}$ | 1.53E-04 | 8.08E-05 | 2.26E-04 |
| $M_{MD}$ | 6.13E-04 | 3.26E-04 | 9.01E-04 |
| $M_{MQ}$ | 4.13E-04 | 1.58E-04 | 6.67E-04 |
| $M_{QD}$ | 1.08E-03 | 4.67E-04 | 1.69E-03 |
| $M_{QM}$ | 1.12E-03 | 6.84E-04 | 1.56E-03 |

---

287 Notes: Parameters included here comprise population size measures ( $N_{A1}$ ,  $N_{A2}$ ,  $N_{DQ}$ ,  $N_{MS}$ , and  $N_{QL}$ ,  
288 indicating ancestral populations, QL+MS, DQ, MS and QL, respectively), population divergence  
289 times ( $T_1$  and  $T_2$ , years), migration per generation after diversification between QL and MS, QL  
290 and DQ, and DQ and MS.

291

292 **Assessing the correlation between genetic differentiation and environmental**  
293 **variables**

294 Among the seven variables used for the GF (gradient forest) analysis, precipitation  
295 seasonality (bio15) and temperature seasonality (bio04) were identified as the two  
296 most important predictors of genetic variation. Mean temperatures of the warmest

297 quarter (bio10), annual precipitation (bio12) and precipitation of the wettest month  
298 (bio13) were also of high importance (Fig. 8). The redundancy analysis (RDA)  
299 revealed a significant amount of genetic variation among populations associated with  
300 the seven important environmental variables (27.06%,  $P = 0.001$ ). Each of the two  
301 axes explained a significant amount of variation (Axis 1: 25.80%,  $P = 0.001^{**}$ ; Axis 2:  
302 17.03%,  $P = 0.001^{**}$ ; Fig. 8). Separate analyses of the seven environmental variables  
303 individually also found significant association with genetic variation (Table 4).  
304 Consistent with the GF analysis, temperature seasonality (bio04; 6.498%,  $P = 0.001^{**}$ )  
305 and precipitation seasonality (bio15; 6.27%,  $P = 0.001^{**}$ ) were the two most  
306 important predictors (Table 4).

307

308 **Table 4.** Redundancy analysis (RDA) results based on seven important environmental variables  
309 identified by GF analysis.  $^{**}$ ,  $P < 0.01$ .

| Environmental variables | Constrained proportion (%) | $F$ -statistic | $P$                 |
|-------------------------|----------------------------|----------------|---------------------|
| Bio04                   | 6.498                      | 4.0309         | 0.001 <sup>**</sup> |
| Bio15                   | 6.27                       | 3.88           | 0.001 <sup>**</sup> |
| Bio02                   | 5.138                      | 3.1418         | 0.001 <sup>**</sup> |
| Bio13                   | 4.477                      | 2.7183         | 0.001 <sup>**</sup> |
| Bio11                   | 4.02                       | 2.4294         | 0.001 <sup>**</sup> |
| Bio10                   | 3.973                      | 2.3996         | 0.001 <sup>**</sup> |
| Bio12                   | 3.936                      | 2.3762         | 0.001 <sup>**</sup> |

310

311

(a)

### R<sup>2</sup> weighted importance

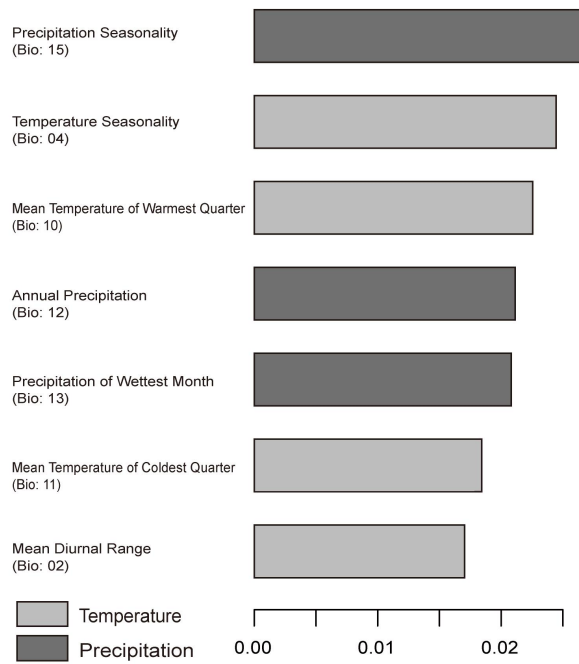

(b)

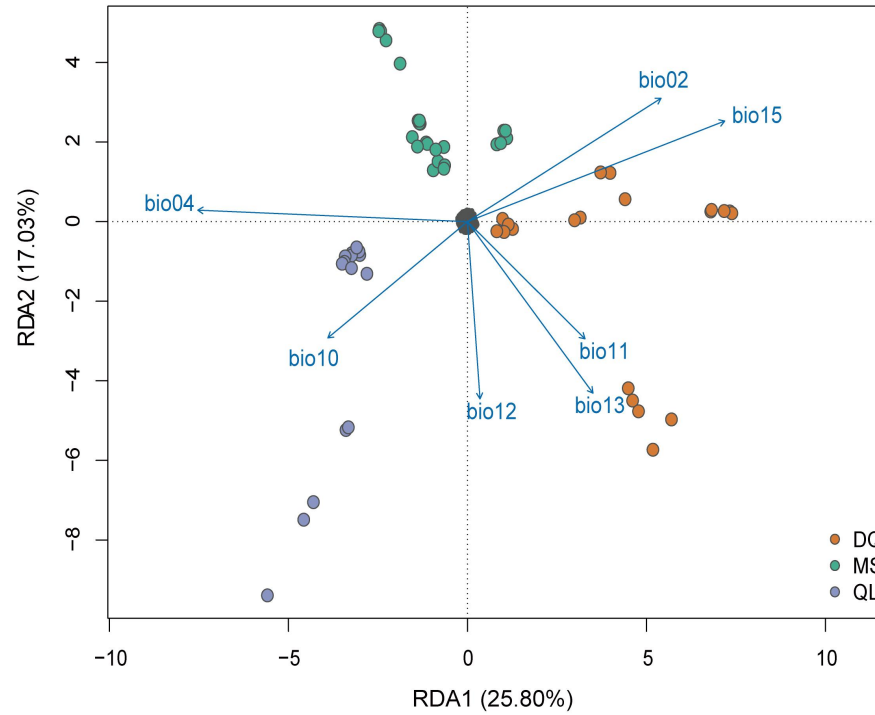

312

313 Fig. 8 Correlation between genetic distance and environmental difference. (a) R<sup>2</sup>-weighted importance of environmental variables that explain genomic variation

314 from GF analysis. (b) Redundancy analysis showing the relationship between the independent climate parameters and population structure of *K. uniflora*. Individuals

315 are colored points and colors represent three groups (QL, MS, DQ). Small black points are SNPs.



## 316 **Detecting and annotating outlier loci**

317 The average  $F_{ST}$  between populations was estimated as 0.24, but ranged from 0.05  
318 to 0.76 (Fig. 9). BAYESCAN identified 7,917 outlier ( $F_{st}$  values ranging from 0.47 to  
319 0.76) sites out of the total 114,746 SNPs. Through comparisons with the reference  
320 genome, we found these outliers were located in 159 genes, of which 87 had BLAST  
321 hits in the Unified Protein Database, related to 15 biological processes (second-level  
322 gene ontology (GO) terms) (Fig. 10a). Gene set enrichment (GSE) analysis for all 87  
323 genes detected five significantly over-represented terms ( $p < .05$ ) associated with  
324 reproduction, including: “reproduction” (13 genes), “reproductive process” (13 genes),  
325 “reproductive developmental process” (11 genes), “fruit development” (6 genes), and  
326 “seed development” (6 genes) (Fig. 10b; Table 5).

327

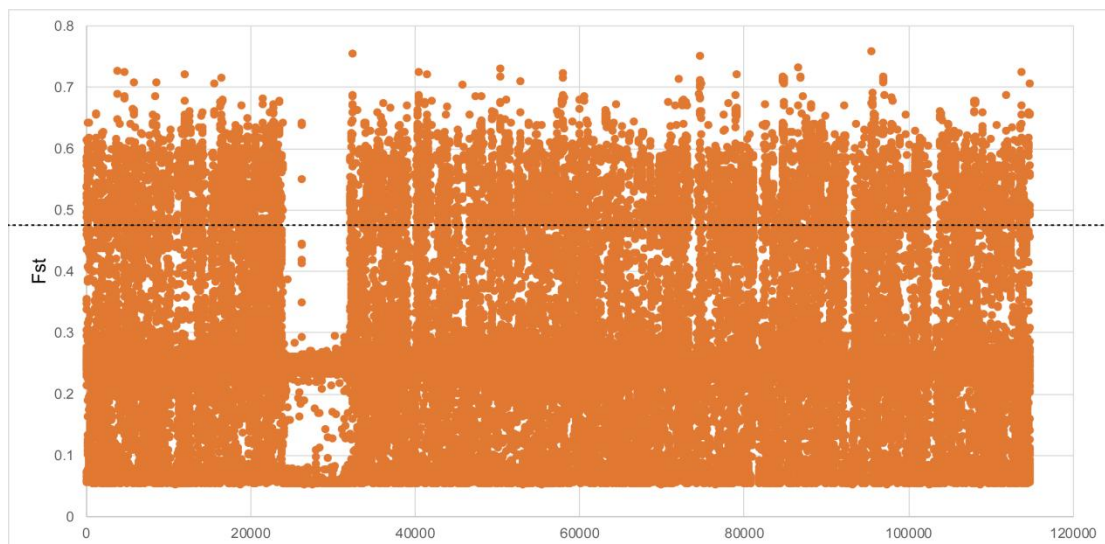

328

329 Fig. 9  $F_{ST}$  values of 1, 114,746 SNPs among 60 *K. uniflora* individuals calculated by BAYESCAN.

330 The x-axis represents the sequence number of SNPs. The black dash line indicates the cut-off line

331 between identified outliers and non-outliers.

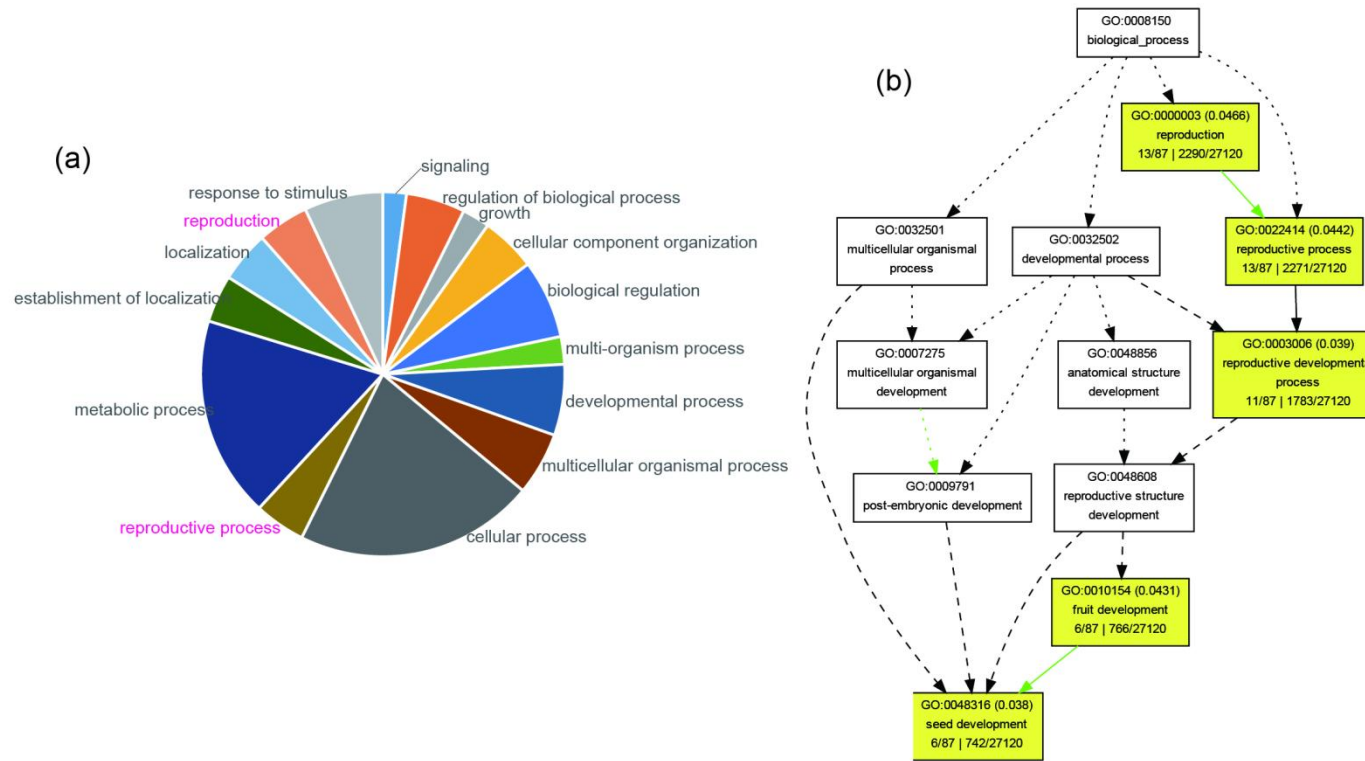

334 Fig. 10 Gene set enrichment (GSE) analysis of genes containing outlier SNPs. (a) Pie chart of second-level gene ontology (GO) terms (biological process) of genes

335 showing outlier  $F_{st}$  values. (b) Graphical results showing enriched GO terms (second to sixth level; highlighted with yellow color) of genes containing outlier SNPs.

336

337 **Table 5.** The significantly over-represented GO terms of genes containing outlier SNPs in *K. uniflora*.

| GO term    | Class | Description                        | Significant | Annotated | <i>p</i> -value |
|------------|-------|------------------------------------|-------------|-----------|-----------------|
| GO:0048316 | P     | seed development                   | 6           | 742       | 0.038           |
| GO:0003006 | P     | reproductive developmental process | 11          | 1783      | 0.039           |
| GO:0010154 | P     | fruit development                  | 6           | 766       | 0.043           |
| GO:0022414 | P     | reproductive process               | 13          | 2271      | 0.044           |
| GO:0000003 | P     | reproduction                       | 13          | 2290      | 0.047           |

338

339 **Discussion**

340 ***Kingdonia uniflora* is characterized by high allelic heterozygosity, slow LD decay,**  
341 **reduced efficacy of purifying selection, and unseen sexual reproduction**

342 In diploid asexuals, high levels of allelic divergence are expected to result from two  
343 factors: (1) long-term evolution under obligate asexuality, i.e., Meselson effect (Birky  
344 1996; Mark Welch and Meselson 2000) and (2) transition to asexual reproduction via  
345 hybridization between sexual species (Jaron et al. 2021). The Meselson effect is  
346 usually considered to be a strong indicator of long-term evolution under obligate  
347 asexuality (Hartfield 2016; Brandt et al. 2021), yet this phenomenon has been shown  
348 to appear in young lineages of less than 100,000 years age (Pellino et al. 2013). Here  
349 we detected high allelic heterozygosity indicating obligate or high levels of asexuality  
350 in the flowering plant species *K. uniflora*: (1) an excess of observed individual  
351 heterozygosity over Hardy-Weinberg expectation as indicated by negative  $F_{IS}$  values  
352 (Fig. 2) (which is different from what is observed in the sister sexual species *C.*  
353 *agrestis* (mean  $F_{IS} = 0.02$ ; Table 1 in Zhang et al. 2020) and (2) greater genetic  
354 divergence within individuals than that between populations revealed by the AMOVA  
355 analysis (Table 2). Theoretically, as mentioned above, both the Meselson effect and  
356 hybrid origin can explain high allelic heterozygosity in diploid asexuals. Hence  
357 high levels of allelic divergence detected in *K. uniflora* could be explained as  
358 accumulation of heterozygous variants caused by independent evolution of alleles  
359 after the transition to obligate or high levels of asexuality. Alternatively, *K. uniflora*  
360 could have switched to obligate or high level of asexuality via interspecific

361 hybridization, as reported in asexual species of *Meloidogyne*, *Lineus* ribbon worms,  
362 and the *Ranunculus auricomus* complex (Lunt 2008; Pellino et al. 2013; Lunt et al.  
363 2014; Ament-Velasquez et al. 2016). In the current study, although we cannot  
364 formally exclude a hybrid origin of asexuality, this is unlikely to be the case in *K.*  
365 *uniflora*. Different from the above hybrid origins of asexual species with multiple  
366 congeneric sister species, *Kingdonia* is a monotypic genus and has no fossil record  
367 that indicates the presence of parental species for hybridization. The closest related  
368 species, *C. agrestis*, is from a different genus and diverged from *K. uniflora*  
369 tens of millions of years ago (Sun et al. 2020; Zhang et al. 2020). The site frequency  
370 spectrum reveals the level of the heterozygous genotypes shared among  
371 lineages/populations greatly exceed those under Hardy-Weinberg equilibrium (Fig. 3),  
372 indicating high allelic heterozygosity occurred prior to lineage differentiation. Hence,  
373 in any event, both explanations (i.e., long-term asexuality and hybrid origin) provide  
374 support that *K. uniflora* has engaged in obligate or high levels of asexuality before  
375 lineage differentiation around 0.5 mya.

376 Asexual reproduction prevents free exchange of alleles among individuals and  
377 results in allele linkage disequilibrium (LD) and in extreme cases (obligate asexuality)  
378 may result in complete physical linkage of markers over the entire genome  
379 (Flint-Garcia 2003; Simko et al. 2006; Schurko et al. 2009). Various genetic processes  
380 in outcrossing can reduce LD and free random mating results in linkage equilibrium  
381 of alleles. Therefore, the level of LD in a species reflects the extent of inbreeding  
382 (non-random mating) or asexuality. Our data show that LD in *K. uniflora* has an

383 average  $r^2$  up to 0.6, and the decay of LD with physical distance is extremely slow  
384 (Fig. 4). This pattern of LD decay is comparable to that seen in the highly  
385 self-fertilizing/asexual plant species, e.g., *Arabidopsis thaliana* (Nordborg et al. 2005;  
386 Kim et al. 2007), *Medicago truncatula* (Branca et al. 2011), and *Spirodela polyrhiza*  
387 (Ho et al. 2019), and completely different from outcrossing populations that often  
388 show rapid LD decay over several hundred bp (Foxe et al. 2009; Mackay et al. 2012;  
389 Ho et al. 2019). The LD decay pattern provides genetic evidence supporting *K.*  
390 *uniflora* as a species is undergoing reproduction by high asexuality.

391 Interference among loci caused by high linkage disequilibrium will decrease the  
392 efficiency of selection by preventing selection from acting individually on each locus  
393 (Gordo and Charlesworth 2001; Otto 2021). Such kinds of selective interference, e.g.,  
394 a selective sweep, can result in a higher ratio of non-synonymous (selected) to  
395 synonymous (neutral) polymorphisms in asexual lineages (Ament-Velásquez et al.  
396 2016; Hartfield 2016). The value of  $\pi_N/\pi_S$  ratio (0.55) in *K. uniflora* is relatively  
397 higher than that (ranging from 0.20 to 0.35) observed in outcrossing plants (Fig. 5b),  
398 implying a higher rate of non-synonymous substitution caused by reduced efficacy of  
399 purifying selection in *K. uniflora*. Under high levels of asexuality, mutations are  
400 expected to be an important source of variation, with mutations typically occurring in  
401 a heterozygous state in asexual species due to independent evolution of alleles (as  
402 found in *K. uniflora* by the  $F_{IS}$  and SFS analyses). However, recessive mutations are  
403 not exposed to selection (Ament-Velásquez et al. 2016), which could be another  
404 reason why a higher rate of non-synonymous substitution is detected in *K. uniflora*.

405 Although high allele divergence, LD level and  $\pi_N/\pi_S$  ratio are characterized by *K.*  
406 *uniflora*, low levels of sexual reproduction cannot be excluded. We detected  
407 recombination events in RDP4 analysis and genealogical network (Supplemental  
408 Table S4; Fig. 6), suggesting occurrence of sexual reproduction. The evidence  
409 supports *K. uniflora* as likely not an obligate asexual species. Although the detected  
410 recombination events could have been from mitotic recombination, due to the  
411 following evidence, we argue that occasional successful sexual reproduction exists in  
412 the species. First, the species still produces seeds, although no seedling has been  
413 observed in the field (Ren et al. 2003; Xu 2015). Second, high allele divergence has  
414 been shown to be compatible with low-rate sexual reproduction (Ceplitis 2003).  
415 Lastly, SVDQuartets showed a quarter of the quartets were incongruent with the  
416 species tree, indicating a portion of the SNPs did not diverge congruently with the rest  
417 of the SNP sites due to incomplete lineage sorting or recombination. Therefore, we  
418 hypothesize that the species likely engages, to an extent, in sexual reproduction to  
419 maintain genetic variation and slow down the speed of Muller's ratchet, supporting the  
420 theory that recombination is necessary for long-term survival. In sum, our results  
421 indicate that *K. uniflora* is not a true obligate asexual species although the asexuality  
422 likely has evolved before 0.5 mya.

423

#### 424 **Evolutionary history of *Kingdonia uniflora***

425 In asexual lineages, reduced efficacy of purifying selection caused by linked selection  
426 will lead to decreased fitness and a reduction in the effective population size  $N_e$ ,

427 (Nordborg and Donnelly 1997; Nordborg 2000; Ho et al. 2019). Populations with  
428 small  $N_e$  values usually show reduced capacity to respond to changing environmental  
429 pressures (Higgins and Lynch 2001; Siol et al. 2007). Currently, our knowledge of the  
430 evolutionary history of relict lineage with highly asexual reproduction, specifically  
431 the origins of genetic differentiation and demographic dynamics, has been extremely  
432 limited. In our study, results from the LEA and PAUP analyses indicate that  
433 populations within each of the three mountain systems, i.e., the Qinling Mountains,  
434 Minshan Mountains, and Daxue-Qionglai Mountains, belong to the same genetic  
435 cluster (Table 2; Fig. 1d). This observation suggests an important role of mountain  
436 isolation in shaping the population genetic structure of the species due to constraints  
437 in dispersal by distance (Fig. 1e) and/or abiotic environments, as evidenced by results  
438 from the GF and RDA analyses (Table 4; Fig. 8). The initial divergence of *K. uniflora*  
439 lineages was estimated to have occurred *c.* 0.51 million years ago (mya) (Table 3; Fig.  
440 7a). The divergence time coincides with the occurrence of the Naynayxungla  
441 Glaciation (0.78-0.50 mya), one of the two largest glaciations on the Qinghai-Tibetan  
442 Plateau (QTP) (Zheng et al. 2002). We speculate that the climate caused by the  
443 Naynayxungla Glaciation triggered intraspecific differentiation in *K. uniflora* by  
444 shifting the distribution range, while the synergistic effects following geographic  
445 distance and environmental difference have further driven *K. uniflora* to eventually  
446 evolved into different genetic lineages.

447 Gene flow is an important way to weaken differentiation within species inhabiting  
448 montane regions, but is usually limited due to the aforementioned reasons. Gene flow



449 in highly asexual species of flowering plants is especially limited due to the generally  
450 poor dispersal ability of propagules for asexual reproduction. Nevertheless, the FSC2  
451 analysis support ancient gene flow between MS and both QL and DQ (Table 3; Fig.  
452 7a). Our data from ecological niche modeling suggests gene flow likely occurred  
453 during the LGM when the species expanded its size and distribution to more suitable  
454 habitats as detailed below. Similar to many other cold adapted/tolerant species (e.g.,  
455 Anderson et al. 2006; Tian et al. 2010; Opgenoorth et al. 2010; Gao et al. 2015), *K.*  
456 *uniflora* had a significant population expansion during the LGM (10,000-20,000 years  
457 ago) (Fig. 7b), well after the Naynayxungla Glaciation in the QTP or the divergence  
458 of the three lineages (Table 3; Fig. 7a). This provided opportunities for population  
459 admixture of the three previously (~0.5 mya) diverged lineages of *K. uniflora*.  
460 Therefore, the gene flow likely have occurred recently during the LGM.

461

462 **Uneven distribution of sexual reproduction among *Kingdonia uniflora***  
463 **populations is associated with differentiation in genes regulating seed**  
464 **development**

465 Local adaptation involving diversifying selection is viewed as the best and longest  
466 manifestation of an evolutionary response to selection in nature (Kawecki and Ebert  
467 2004; Lovell et al. 2014). Our data suggests such process occurred in *K. uniflora* in  
468 genes controlling seed development. The fact that field surveys and lab experiments  
469 failed to observe successful seed germination indicates failure or low rate of seed  
470 development and germination is likely to be the major factor that has led to

471 non-evident (unseen/infrequent) sexual reproduction in *K. uniflora*. Our results  
472 showed that genes playing a strong role in divergence among *K. uniflora* populations  
473 are enriched for functions involved in seed development (Fig. 10; Table 5), suggesting  
474 differential selection of different alleles in different populations. An obvious  
475 divergence of DNA recombination frequency among lineages, e.g., extremely rare  
476 recombination events in DQ vs. relatively more frequent recombination events within  
477 QL and MS (Fig. 6b,7a) and between QL and MS, suggests different levels of sexual  
478 reproduction among and between population groups in different local environments.  
479 These together indicate the genetic divergence in seed development associated genes  
480 is likely to be the key factor of varied seed germination rate and sexual reproduction  
481 extent among *K. uniflora* populations. Although local adaptation might be constrained  
482 due to reduced efficacy of selection caused by genome-wide interference between loci  
483 (Jaron et al. 2021), our results show genetic differentiation in genes associated with  
484 seed development that, however, appear not to be random. The differences among  
485 populations in environmental variables explains a significant amount of genetic  
486 variation within *K. uniflora* (Fig. 8; Table 4), suggesting putative selection pressure on  
487 genes regulating seed development. This indicates the adaptive constraints posed by  
488 the high LD level in *K. uniflora* may be buffered by infrequent sexual reproduction.  
489 The differences in environmental variables, e.g., seasonal temperature and  
490 precipitation (Fig. 8), may directly affect seed germination rates and the  
491 corresponding genes among populations, further driving diversifying selection in  
492 shaping the diversity of genes regulating seed development. Overall, our results reveal

493 that the infrequency or uneven distribution of sexual reproduction in *K. uniflora* is  
494 associated with genetic differentiation among populations.

495

496

## 497 **Materials and Methods**

### 498 **Sample collection and resequencing**

499 We carefully selected a total of 12 populations (Supplemental Table S5) to represent  
500 all known localities of *K. uniflora*. We collected fresh leaves of five individuals that  
501 were at least ten meters away from each other in each population to reduce the  
502 possibility that each sample was not a physiologically independent ramet. We dried  
503 the leaves in silica gel in the field, then stored them at -20°C before DNA extraction.  
504 Genomic DNA extraction, library construction, and amplification followed the  
505 protocols of Novogene (Beijing, China) (Supplementary Methods). All samples were  
506 sequenced using the Illumina HiSeq 4000 platform with a pair-end read length of 150  
507 bp by Novogene (<https://en.novogene.com/>). Illumina raw reads were filtered by  
508 removing adapters and low-quality reads using Trim Galore v0.6.5  
509 ([https://www.bioinformatics.babraham.ac.uk/projects/trim\\_galore](https://www.bioinformatics.babraham.ac.uk/projects/trim_galore)) with default  
510 options (Phred quality threshold 20; adapter auto-detection) (Krueger 2021)

511

### 512 **SNP calling and quality control**

513 We mapped the filtered reads of each individual to the *K. uniflora* genome (Sun et al.  
514 2020) using BWA-MEM v0.7.12-r1039 (Li 2013) with default parameters. We then

515 converted sequence alignment/map (SAM) format files to BAM and sorted the BAM  
516 files using SAMtools v1.6 (Li et al. 2009) and conducted the following analyses in  
517 Genome Analysis Toolkit (GATK, v4.0) (Depristo et al. 2011). We first marked  
518 duplicate reads using MarkDuplicates. We then processed the data with  
519 AddOrReplaceReadGroups to replace all read groups in the INPUT file with a single  
520 new read group name and assign all reads to this read group in the OUTPUT BAM.  
521 To identify SNPs, we first conducted single-sample haplotype calling with  
522 HaplotypeCaller, and then identified Multi-sample SNPs using GenotypeGVCFs after  
523 merging the haplotype caller results from each sample using CombineGVCFs which  
524 aligned the haplotypes among samples. To obtain high quality SNPs, we filtered  
525 multi-sample SNPs using VariantFiltration with strict filter settings “ $QD < 2.0 \parallel MQ <$   
526  $40.0 \parallel FS > 60.0 \parallel SOR > 3.0 \parallel MQRankSum < -12.5 \parallel ReadPosRankSum < -8.0$ ”. We  
527 further filtered the SNPs data to exclude monomorphic or triallelic variants, indels,  
528 and SNPs missing in any samples via VCFtools v0.1.16 (Danecek et al. 2011) for  
529 further analyses.

530

### 531 **Genetic diversity and population structure**

532 To assess the population structure of *K. uniflora*, we performed the following analyses.  
533 We used Landscape and Ecological Association (LEA) (v3.3.2) R package (Frichot  
534 and François 2015) to determine the number of ancestral populations. LEA was  
535 developed for large genotypic matrices and does not rely on the genetic assumptions  
536 of the absence of genetic drift, Hardy-Weinberg or linkage equilibrium in ancestral

537 populations (Pritchard et al. 2000). We also used a coalescent-based method to  
538 estimate a “species tree” based on the SNP data for comparison with results from  
539 LEA. Specifically, we used the SVDQuartets method (Chifman and Kubatko  
540 2014) implemented in PAUP\* v4.0a166 (Swofford, 2003;  
541 <http://paup.phylosolutions.com/>) with 100 bootstrap replicates and the quartet  
542 assembly method QFM to produce a species tree (Reaz et al. 2014).

543 We estimated nucleotide diversity ( $\pi$ ) and genetic differentiation ( $F_{ST}$ ) between  
544 groups identified in the aforementioned analyses using VCFtools v0.1.16 (Danecek et  
545 al. 2011), and used Analysis of Molecular Variance (AMOVA) in Arlequin v3.5.2.2  
546 (Excoffier and Lischer 2010) to estimate relative contributions of genetic variation  
547 from within and between groups. To determine if genetic differentiation is associated  
548 with geographic distance, we performed an IBD (isolation by geographic distance)  
549 analysis. We first estimated population-level genetic differentiation  $F_{ST}$  using the Weir  
550 and Cockerham method (Weir and Cockerham 1984) implemented in HIERFSTAT  
551 (Goudet 2005) in R v3.6.1 (R Core Team 2014). We then calculated genetic distance  
552 with the formula  $F_{ST}/(1-F_{ST})$  and computed the pairwise geographic distance among  
553 12 populations using GENALEX v6.5 (Peakall and Smouse 2012). We then tested the  
554 significance for the relationship between geographical distances and genetic distance  
555 among populations by conducting Mantel tests with ADE4 v1.7  
556 (<https://CRAN.R-project.org/package=ade4>) using *mantel.rtest* with 9999  
557 permutations.

558

559 **Detecting genomic signatures and signs of asexual and sexual reproduction**

560 To understand the reproductive strategies, we first employed VCFtools v0.1.16  
561 (Danecek et al. 2011) (option-het) to calculate  $F_{IS}=1-H_{obs}/H_{exp}$  for each individual,  
562 where  $H_{obs}$  and  $H_{exp}$  are the observed and expected heterozygosity, respectively. A  
563 negative  $F_{IS}$  value indicates an excess of observed individual heterozygosity. We then  
564 examined the distribution pattern of the excessive heterozygosity within and among  
565 the genetic groups identified in the aforementioned analyses by generating a site  
566 frequency spectrum (SFS) using Pop-Con with standard parameters  
567 (<https://github.com/YoannAnselmetti/Pop-Con>). Twelve randomly selected  
568 individuals that cover all populations were used for the SFS analysis.

569 We further examined other genetic consequences of asexual reproduction (i.e.,  
570 linkage disequilibrium (LD) and reduced efficiency of purifying selection) and  
571 genetic evidence of unseen sexual reproduction (i.e., recombination). We calculated  
572 pairwise linkage disequilibrium ( $r^2$  value) and modeled the decline of LD with  
573 physical distance using PopLDdecay v3.40 (Zhang et al. 2019) with default settings.  
574 Within each contig we calculated LD between pairs of sites up to 300 kb and 1000 kb,  
575 respectively. In obligate asexuals, genome-wide LD between loci is expected, and the  
576 decline of LD between loci does not depend on their physical distance (Vakhrusheva  
577 et al. 2020).

578 To test if *K. uniflora* is characterized by reduced efficacy of purifying selection, we  
579 calculated the  $\pi_N/\pi_S$  ratio of the species. For asexual species, individuals from the  
580 same population may be clones via descending from a common ancestor via only

581 clonal reproduction, possibly over many generations (Ho et al. 2019). Therefore, prior  
582 to the calculation, we grouped individuals by conducting multidimensional scaling  
583 (MDS) analysis in plink v1.9 with the options -cluster, -mds-plot 2 eigvals and  
584 -allow-extrachr (Purcell et al. 2007) to group individuals that were genotypically  
585 highly similar into the same genotypic group within a population. We then randomly  
586 selected one individual from each genotypic group and generated a concatenated  
587 coding sequence for each selected individual based on SNP loci from coding regions  
588 using a custom script (Supplemental Methods). The sequence matrix comprising all  
589 above selected individuals was used for following nucleotide diversity calculation.  
590 Designated nucleotide diversity at 0-fold and 4-fold degenerate positions,  $\pi_N$  ( $\pi_0$ ) and  
591  $\pi_S$  ( $\pi_4$ ), were calculated in MEGA (v10.1.6) (Kumar et al. 2018).

592 To assess if any unseen sexual reproduction may have occurred in *K. uniflora*, we  
593 reconstructed the relationship of individuals using SNP data with the NeighborNet  
594 method in SplitsTree v4.13.1 (Huson and Bryant 2006) with default settings. The  
595 method does not force a tree-like phylogeny in the analysis and can reveal  
596 phylogenetic networks resulting from recombination events. We further used  
597 Recombination Detection Program (RDP4) (Martin et al. 2015) to detect  
598 recombination events: “RDP4 implements a range of methods for both detection and  
599 characterization of recombination events that are evident within a sequence alignment  
600 without any prior user indication of a non-recombinant set of reference sequences”  
601 (Martin et al. 2015). We ran the analyses using six algorithms (RDP, BootScan,  
602 MaxChi, Chimera, GeneConv and SiScan) of recombination signal detection with

603 Bonferroni correction and the highest acceptable  $p$  value 0.05. Recombination events  
604 that were identified by at least three of the six methods were considered.

605

### 606 **Inferring population demographic history and species distributions**

607 To obtain a comprehensive view of the species' evolutionary history, we first inferred  
608 the demographic history of *K. uniflora* using *fastsimcoal2* (FSC2; Excoffier et al.  
609 2013) with the following details. We tested eight possible  $N_e$  models (Supplemental  
610 Fig. S5) to find the best model explaining our data for the genetic groups revealed by  
611 PAUP and LEA analyses. Then we estimated the composite likelihood of the observed  
612 data given a specified model using SFS (which was constructed here using  
613 *easySFS.py* instead of Pop-Con to generate a direct input file for FSC2)  
614 (<https://github.com/isaacovercast/easySFS>). Each model was run 20 times with  
615 1,000,000 simulations for the calculation of the composite likelihood, and 40  
616 expectation-conditional maximization (ECM) cycles. We compared the models based  
617 on the maximum likelihood value across 50 independent runs using the Akaike  
618 Information Criterion and Akaike's weight of evidence and chose the model with the  
619 maximum Akaike's weight value as the optimal model. Finally, we calculated  
620 confidence intervals of parameter estimates from 100 para-metric bootstrap replicates  
621 by simulating SFS from the maximum composite likelihood estimates and  
622 re-estimating parameters each time.

623 We also performed ecological niche modeling (ENM) to reconstruct the distribution  
624 range of the species in the present and past using MAXENT (Phillips and Dudik 2008)



625 with population present occurrence data and climatic variables of the occurrence  
626 locations. Species' presence occurrence data were compiled from the Chinese Virtual  
627 Herbarium (<http://www.cvh.ac.cn>) and our own field collections (Supplemental Table  
628 S5). We downloaded the climate layers of 19 bioclimatic variables (Supplemental  
629 Table S6) at a 2.5 arc minute resolution at present (average for the years 1970-2000)  
630 and during the last glacial maximum (LGM: *c.* 21 thousand years before present (kyr  
631 BP)) from WorldClim database website (<http://www.worldclim.org/>) (Fick and  
632 Hijmans 2017). To avoid multicollinearity, a Pearson correlation analysis was  
633 conducted to eliminate one of the variables in each pair with a correlation higher than  
634 0.75, which resulted in seven climatic layers retained for analyses (Supplemental  
635 Table S6).

636

### 637 **Assessing the correlation between differentiation and environmental variables**

638 We performed a gradient forest (GF) analysis implemented in GRADIENTFOREST  
639 v0.1 (<http://gradientforest.r-forge.r-project.org/>) to identify potential key  
640 environmental drivers of genomic variation in *K. uniflora*. The gradient forest method  
641 captures complex relationships between potentially correlated predictors (e.g.,  
642 climatic variables) and multiple response variables (e.g., genetic variation), and  
643 provides the overall importance for each predictor weighted by  $R^2$  (Ellis et al. 2012;  
644 Ma et al. 2020). The seven climatic layers retained in the ENM analysis were used as  
645 environmental predictors in the GF analysis for analyses of all SNPs. The analysis  
646 was run 1000 times to obtain the variability of  $R^2$ , and the run with the highest overall

647 performance ( $R^2$ ) for calculating weighted importance of predictors on response  
648 variables. To verify the results of GF analysis, we performed a redundancy analysis  
649 (RDA) to evaluate the associations between genetic variation and the seven  
650 environmental variables. We constrained the dependent variables (individuals) by the  
651 explanatory variables (environmental variables). The RDA analysis was performed  
652 using the *rda* function in VEGAN v2.5 (Oksanen et al. 2018;  
653 <http://CRAN.R-project.org/package=vegan>). The *anova.cca* function was used to  
654 calculate overall significance and significance of each climate variable using 9999  
655 permutations.

656

### 657 **Detecting and annotating outlier loci**

658 To detect potential loci under diversifying selection, we performed an overall  $F_{ST}$   
659 outliers test in BAYESCAN v2.1 (Foll and Gaggiotti 2008) with default parameters.  
660 BAYESCAN identifies outliers using differences in allele frequencies between  
661 populations. A locus-specific component ( $\alpha$ ) was used to differ loci under-diversifying  
662 selection ( $\alpha > 0$ ) from that under balancing or purifying selection. Significance is based  
663 on FDR-corrected  $q$ -values ( $< 0.01$ ). Loci under strong diversifying selection are those  
664 whose  $F_{st}$  values are larger than expected from coalescent simulation of neutral  
665 evolution (Strand et al. 2012).

666 To determine what functions the genes containing SNP outliers may have, we  
667 annotated each of these genes using gene ontology (GO) terms with TBtools (Chen et  
668 al., 2018). We then used the Singular Enrichment Analysis (SEA) tool in agriGO v2.0

669 (Tian et al. 2017) to analyze gene enrichment and tested for statistical significance of  
670 gene enrichment using the chi-squared test.

671

672

### 673 **Data accessibility**

674 *K. uniflora* resequencing reads have been deposited in the NCBI Short Read Archive  
675 (SRA) under accession SRA-----.

676

677

### 678 **Competing interest statement**

679 The authors declare no competing interests.

680

681

### 682 **Acknowledgments**

683 This work was supported by the Program Foundation for the Backbone of Scientific  
684 Research by Wuhan Botanical Garden, Chinese Academy of Sciences (Y855241G01),  
685 the National Natural Science Foundation of China (U2003122), the Strategic Priority  
686 Research Program of Chinese Academy of Sciences (XDA20050203), and the  
687 National Natural Science Foundation of United States (DEB-1442161).

688

689

### 690 **Author contributions**

691 HW, JX, and HS developed the idea and designed the experiment; YS, XZ, and HZ  
692 collected the leaf materials; YS, XZ, and AZ performed the statistical analyses; YS,  
693 JBL, and JX interpreted the results and wrote the manuscript. All authors read, edited  
694 and approved the final manuscript. YS, XZ, and AZ contributed equally to this work.

695

696

## 697 **References**

- 698 Ament-Velasquez SL, Figuet E, Ballenghien M, Zattara EE, Norenburg JL,  
699 Fernandez-Alvarez FA, Bierne J, Bierne N, Galtier N. 2016. Population  
700 genomics of sexual and asexual lineages in fissiparous ribbon worms (Lineus,  
701 Nemertea): hybridization, polyploidy and the Meselson effect. *Mol Ecol* 25:  
702 3356-3369. doi: 10.1111/mec.13717
- 703 Anderson LL, Hu SF, Nelson DM, Petit RJ, Paige KN. 2006. Ice-age endurance: DNA  
704 evidence of a white spruce refugium in Alaska. *Proc Natl Acad Sci USA* 13:  
705 12447–12450. doi: 10.1073/pnas.0605310103
- 706 APG IV. 2016. An update of the angiosperm phylogeny group classification for the  
707 orders and families of flowering plants. *Bot J Linn Soc* 181: 1–20. doi:  
708 10.1111/boj.12385
- 709 Balloux F, Lehmann L, de Meeûs T. 2003. The population genetics of clonal and  
710 partially clonal diploids. *Genetics* 164: 1635-1644. doi:  
711 10.1093/genetics/164.4.1635
- 712 Beck JB, Alexander PJ, Allphin L, Al-Shehbaz IA, Rushworth C, Bailey CD,

- 713 Windham MD. 2012. Does hybridization drive the transition to asexuality in  
714 diploid *Boechera*? *Evolution* 66: 985-995. doi:  
715 [10.1111/j.1558-5646.2011.01507.x](https://doi.org/10.1111/j.1558-5646.2011.01507.x).
- 716 Birky CW, Wolf C, Maughan H, Herbertson L, Henry E. 2005. Speciation and  
717 selection without sex. *Hydrobiologia* 546: 29–45. doi:  
718 [10.1007/s10750-005-4097-2](https://doi.org/10.1007/s10750-005-4097-2)
- 719 Birky CW. 1996. Heterozygosity, heteromorphy, and phylogenetic trees in asexual  
720 eukaryotes. *Genetics* 144: 427–437. doi: [10.1093/genetics/144.1.427](https://doi.org/10.1093/genetics/144.1.427)
- 721 Branca A, Paape TD, Zhou P, Briskine R, Farmer AD, Mudge J, Bharti AK,  
722 Woodward JE, May GD, Gentzbittel L, et al. 2011. Whole-genome nucleotide  
723 diversity, recombination, and linkage disequilibrium in the model legume  
724 *Medicago truncatula*. *Proc Natl Acad Sci USA* 108: E864-E870. doi:  
725 [10.1073/pnas.1104032108](https://doi.org/10.1073/pnas.1104032108)
- 726 Brandt A, Tran Van P, Bluhm C, Anselmetti Y, Dumas Z, Figuet E, Francois CM,  
727 Galtier N, Heimburger B, Jaron KS, et al. 2021. Haplotype divergence supports  
728 long-term asexuality in the oribatid mite *Oppiella nova*. *Proc Natl Acad Sci USA*  
729 118: e2101485118. doi: [10.1073/pnas.2101485118](https://doi.org/10.1073/pnas.2101485118)
- 730 Ceplitis A. 2003. Coalescence times and the Meselson effect in asexual eukaryotes.  
731 *Genet Res* 82: 183-190. doi: [10.1017/s0016672303006487](https://doi.org/10.1017/s0016672303006487)
- 732 Chen C, Chen H, He YH, Xia R. 2018. TBtools, a Toolkit for Biologists integrating  
733 various biological data handling tools with a user-friendly interface. DOI:  
734 <https://doi.org/10.1101/289660>

- 735 Chen J, Glémin S, Lascoux M. 2017. Genetic diversity and the efficacy of purifying  
736 selection across plant and animal species. *Mol Biol Evol* 34: 1417-1428.  
737 doi:10.1093/molbev/msx088
- 738 Chifman J, Kubatko L. 2014. Quartet inference from SNP data under the coalescent  
739 model. *Bioinformatics* 30: 3317–3324. doi: 10.1093/bioinformatics/btu530
- 740 Corley LS, Blankenship JR, Moore AJ. 2001. Genetic variation and asexual  
741 reproduction in the facultatively parthenogenetic cockroach *Nauphoeta cinerea* :  
742 implications for the evolution of sex. *J Evolution Biol* 14: 68-74. doi:  
743 10.1046/j.1420-9101.2001.00254.x
- 744 Danecek P, Auton A, Abecasis G, Albers CA, Banks E, DePristo MA, Handsaker RE,  
745 Lunter G, Marth GT, Sherry ST, et al. 2011. The variant call format and  
746 VCFtools. *Bioinformatics* 27: 2156-2158. doi: 10.1093/bioinformatics/btr330
- 747 de Meeûs T, Balloux F. 2004. Clonal reproduction and linkage disequilibrium in  
748 diploids: a simulation study. *Infect Genet Evol* 4: 345-351. doi:  
749 10.1016/j.meegid.2004.05.002
- 750 DePristo MA, Banks E, Poplin R, Garimella KV, Maguire JR, Hartl C, Philippakis  
751 AA, del Angel G, Rivas MA, Hanna M, et al. 2011. A framework for variation  
752 discovery and genotyping using next-generation DNA sequencing data. *Nat*  
753 *Genet* 43: 491-498. doi: 10.1038/ng.806
- 754 Ellis N, Smith S, Pitcher C. 2012. Gradient forests: calculating importance gradients  
755 on physical predictors. *Ecology* 93: 156–168. doi: 10.1890/11-0252.1
- 756 Excoffier L, Dupanloup I, Huerta-Sanchez E, Sousa VC, Foll M. 2013. Robust

- 757 demographic inference from genomic and SNP data. *PLoS Genet* 9: e1003905.  
758 doi: 10.1371/journal.pgen.1003905
- 759 Excoffier L, Lischer H. 2010. Arlequin suite ver 3.5: A new series of programs to  
760 perform population genetics analyses under Linux and Windows. *Mol Ecol*  
761 *Resour* 10: 564–567. doi: 10.1111/j.1755-0998.2010.02847.x
- 762 Felsenstein J. 1974. The evolutionary advantage of recombination. *Genetics* 78:  
763 737–756. doi:10.1093/genetics/78.2.737
- 764 Fick S, Hijmans R. 2017. WorldClim 2: new 1-km spatial resolution climate surfaces  
765 for global land areas. *Int J Climatol* 37: 4302–4315. doi: 10.1002/joc.5086
- 766 Flint-Garcia SA, Thornsberry JM, Buckler ESt. 2003. Structure of linkage  
767 disequilibrium in plants. *Annu Rev Plant Biol* 54: 357-374. doi:  
768 10.1146/annurev.arplant.54.031902.134907
- 769 Foll M, Gaggiotti O. 2008. A genome-scan method to identify selected loci  
770 appropriate for both dominant and codominant markers: a bayesian perspective.  
771 *Genetics* 180: 977–993. doi: 10.1534/genetics.108.092221
- 772 Foxe JP, Slotte T, Stahl EA, Neuffer B, Hurka H, Wright SI. 2009. Recent speciation  
773 associated with the evolution of selfing in *Capsella*. *Proc Natl Acad Sci USA* 106:  
774 5241–5245. doi: 10.1073/pnas.0807679106
- 775 Frichot E, François O. 2015. LEA: AnRpackage for landscape and ecological  
776 association studies. *Methods Ecol Evol* 6: 925–929. doi:  
777 10.1111/2041-210X.12382
- 778 Gao Y-D, Zhang Y, Gao X-F, Zhu Z-M. 2015. Pleistocene glaciations, demographic

- 779 expansion and subsequent isolation promoted morphological heterogeneity: A  
780 phylogeographic study of the alpine *Rosa sericea* complex (Rosaceae). *Sci Rep* 5:  
781 11698. doi: 10.1038/srep11698
- 782 Gladyshev E, Meselson M. 2008. Extreme resistance of bdelloid rotifers to ionizing  
783 radiation. *Proc Natl Acad Sci USA* 105: 5139–5144. doi:  
784 10.1073/pnas.0800966105
- 785 Goudet J. 2005. HIERFSTAT, a package for R to compute and test hierarchical  
786 F-statistics. *Mol Ecol Notes* 5: 184–186. doi: 10.1111/j.1471-8286.2004.00828.x
- 787 Hartfield M. 2016. On the origin of asexual species by means of hybridization and  
788 drift. *Mol Ecol* 25: 3264-3265. doi: 10.1111/mec.13713
- 789 Heethoff M, Domes K, Laumann M, Maraun M, Norton RA, Scheu S. 2007. High  
790 genetic divergences indicate ancient separation of parthenogenetic lineages of the  
791 oribatid mite *Platynothrus peltifer* (Acari, Oribatida). *J Evolution Biol* 20:  
792 392-402. doi: 10.1111/j.1420-9101.2006.01183.x
- 793 Henry L, Schwander T, Crespi BJ. 2012. Deleterious mutation accumulation in  
794 asexual *Timema* stick insects. *Mol Biol Evol* 29: 401-408. doi:  
795 10.1093/molbev/msr237
- 796 Higgins K, Lynch M. 2001. Metapopulation extinction caused by mutation  
797 accumulation. *Proc Natl Acad Sci USA* 98: 2928–2933. doi:  
798 10.1073/pnas.031358898
- 799 Ho EKH, Bartkowska M, Wright SI, Agrawal AF. 2019. Population genomics of the  
800 facultatively asexual duckweed *Spirodela polyrhiza*. *New Phytol* 224: 1361-1371.



801       doi: 10.1111/nph.16056

802       Huson D, Bryant D. 2006. Application of phylogenetic networks in evolutionary  
803       studies. *Mol Biol Evol* 23: 254–267. doi: 10.1093/molbev/msj030

804       Jaron KS, Bast J, Nowell RW, Ranallo-Benavidez TR, Robinson-Rechavi M,  
805       Schwander T. 2021. Genomic features of parthenogenetic animals. *J Hered* 112:  
806       19-33. doi:10.1093/jhered/esaa031

807       Kawecki TJ, Ebert D. 2004. Conceptual issues in local adaptation. *Ecol Lett* 7:  
808       1225-1241. doi: 10.1111/j.1461-0248.2004.00684.x

809       Kim S, Plagnol V, Hu TT, Toomajian C, Clark RM, Ossowski S, Ecker JR, Weigel D,  
810       Nordborg M. 2007. Recombination and linkage disequilibrium in *Arabidopsis*  
811       . *Nat Genet* 39: 1151-1155. doi: 10.1038/ng2115

812       Kumar S, Stecher G, Li M, Knyaz C, Tamura K. 2018. MEGA X: molecular  
813       evolutionary genetics analysis across computing platforms. *Mol Biol Evol* 35:  
814       1547-1549. doi: 10.1093/molbev/msy096

815       Laine VN, Sackton T, Meselson M. 2020. Sexual reproduction in bdelloid rotifers.  
816       bioRxiv doi: 10.1101/2020.08.06.239590v4

817       Lei Y, Ren L, Li Z, Ren Y. 2000. Studies on vegetative reproduction pattern of  
818       *Kingdonia uniflora*. *Acta Botanica Boreali-Occidentalia Sinica*, 20: 432-435.

819       Li H, Handsaker B, Wysoker A, Fennell T, Ruan J, Homer N, Marth G, Abecasis G,  
820       Durbin R, 1000 Genome Project Data Processing Subgroup. 2009. the sequence  
821       alignment/map format and SAMtools. *Bioinformatics* 25: 2078-2079. doi:  
822       10.1093/bioinformatics/btp352

- 823 Li H. 2013. Aligning sequence reads, clone sequences and assembly contigs with  
824 BWA-MEM. arXiv doi:1303.3997
- 825 Li J, Zhang W, Li H. 2003. Research on distribution pattern of rare and endangered  
826 plant *Kingdonia uniflora* population. *Journal of Northwest Forestry University*  
827 18: 38-40.
- 828 Li J, Zhao J, Li L. 2004. Property of sexual reproduction of *Kingdonia uniflora*  
829 population in Mountain Taibai. *Journal of Northwest Sci-Tech University of*  
830 *Agriculture and Forestry* 32: 89-92.
- 831 Lovell JT, Grogan K, Sharbel TF, McKay JK. 2014. Mating system and  
832 environmental variation drive patterns of adaptation in *Boechera spatifolia*  
833 (Brassicaceae). *Mol Ecol* 23: 4486-4497. doi: 10.1111/mec.12879
- 834 Lunt DH, Kumar S, Koutsovoulos G, Blaxter ML. 2014. The complex hybrid origins  
835 of the root knot nematodes revealed through comparative genomics. *Peer J* 2:  
836 e356. doi: 10.7717/peerj.356
- 837 Lunt DH. 2008. Genetic tests of ancient asexuality in root knot nematodes reveal  
838 recent hybrid origins. *BMC Evol Biol* 8: 194. doi: 10.1186/1471-2148-8-194
- 839 Ma S, Tian Y, Li J, Yu H, Cheng J, Sun P, Fu C, Liu Y, Watanabe Y. 2020. Climate  
840 variability patterns and their ecological effects on ecosystems in the  
841 Northwestern North Pacific. *Front Mar Sci* 7: 546882. doi:  
842 10.3389/fmars.2020.546882
- 843 Mackay TF, Richards S, Stone EA, Barbadilla A, Ayroles JF, Zhu D, Casillas S, Han Y,  
844 Magwire MM, Cridland JM, et al. 2012. The *Drosophila melanogaster* genetic

- 845 reference panel. *Nature* 482: 173-178. doi: 10.1038/nature10811
- 846 Mark Welch D, Meselson M. 2000. Evidence for the evolution of bdelloid rotifers  
847 without sexual reproduction or genetic exchange. *Science* 288: 1211–1215. doi:  
848 10.1126/science.288.5469.1211
- 849 Martin DP, Murrell B, Golden M, Khoosal A, Muhire B. 2015. RDP4: Detection and  
850 analysis of recombination patterns in virus genomes. *Virus Evol* 1: vev003. doi:  
851 10.1093/ve/vev003
- 852 Matzk F, Meister A, Schubert I. 2000. An efficient screen for reproductive pathways  
853 using mature seeds of monocots and dicots. *Plant J* 21: 97-108. doi:  
854 10.1046/j.1365-313x.2000.00647.x
- 855 Maynard Smith J. 1978. *The evolution of sex*. Cambridge University Press,  
856 Cambridge (United Kingdom).
- 857 Mogie M. 1992. *The evolution of asexual reproduction in plants*. Chapman & Hall,  
858 London.
- 859 Muller HJ. 1964. The relation of recombination to mutational advance. *Mutat*  
860 *Res-Fund Mol M* 1: 2–9. doi: 10.1016/0027-5107(64)90047-8
- 861 Nei M, Gojobori T. 1986. Simple methods for estimating the numbers of synonymous  
862 and nonsynonymous nucleotide substitutions. *Mol Biol Evol* 3: 418-426. doi:  
863 10.1093/oxfordjournals.molbev.a040410
- 864 Neiman M, Meirmans S, Meirmans PG. 2009. What can asexual lineage age tell us  
865 about the maintenance of sex? *Ann NY Acad Sci* 1168: 185-200. doi:  
866 10.1111/j.1749-6632.2009.04572.x

- 867 Nordborg M, Donnelly P. 1997. The coalescent process with selfing. *Genetics*  
868 146: 1185-1195. doi: 10.1093/genetics/146.3.1185
- 869 Nordborg M, Hu TT, Ishino Y, Jhaveri J, Toomajian C, Zheng H, Bakker E, Calabrese  
870 P, Gladstone J, Goyal R, et al. 2005. The pattern of polymorphism in *Arabidopsis*  
871 *thaliana*. *PLoS Biol* 3: e196. doi: 10.1371/journal.pbio.0030196
- 872 Nordborg M. 2000. Linkage disequilibrium, gene trees and selfing: an ancestral  
873 recombination graph with partial self-fertilization. *Genetics* 154: 923-929. doi:  
874 10.1093/genetics/154.2.923
- 875 Normark B, Judson O, Moran N. 2003. Genomic signatures of ancient asexual  
876 lineages. *Biol J Linn Soc* 79: 69–84. doi: 10.1046/j.1095-8312.2003.00182.x
- 877 Normark BB, Moran NA. 2000. Testing for the accumulation of deleterious mutations  
878 in asexual eukaryote genomes using molecular sequences. *J Nat Hist* 34:  
879 1719-1729. doi: 10.1080/00222930050122147
- 880 Opgenoorth L, Vendramin GG, Mao K, Miede G, Miede S, Liepelt S, Liu J,  
881 Ziegenhagen B. 2010. Tree endurance on the Tibetan Plateau marks the world's  
882 highest known tree line of the Last Glacial Maximum. *New Phytol* 185: 332-342.  
883 doi: 10.1111/j.1469-8137.2009.03007.x
- 884 Otto SP. 2021. Selective Interference and the Evolution of Sex. *J Hered* 112: 9-18. doi:  
885 10.1093/jhered/esaa026
- 886 Peakall R, Smouse P. 2012. GenAlEx 6.5: genetic analysis in Excel. Population  
887 genetic software for teaching and research—an update. *Bioinformatics* 28:  
888 2537–2539. doi: 10.1093/bioinformatics/bts460

- 889 Pellino M, Hojsgaard D, Schmutzer T, Scholz U, Horandl E, Vogel H, Sharbel TF.  
890 2013. Asexual genome evolution in the apomictic *Ranunculus auricomus*  
891 complex: examining the effects of hybridization and mutation accumulation. *Mol*  
892 *Ecol* 22: 5908-5921. doi: 10.1111/mec.12533
- 893 Pettersson ME, Berg OG. 2006. Muller's ratchet in symbiont populations. *Genetica*  
894 130: 199. doi: 10.1007/s10709-006-9007-7
- 895 Phillips S, Dudik M. 2008. Modeling of species distributions with Maxent: new  
896 extensions and a comprehensive evaluation. *Ecography* 31: 161–175. doi:  
897 10.1111/j.0906-7590.2008.5203.x
- 898 Pritchard J, Stephens M, Donnelly P. 2000. Inference of population structure using  
899 multilocus genotype data. *Genetics* 155: 945–959. doi:  
900 10.3410/f.1015548.197423
- 901 Purcell S, Neale B, Todd-Brown K, Thomas L, Ferreira MA, Bender D, Maller J,  
902 Sklar P, de Bakker PI, Daly MJ, Sham PC. 2007. PLINK: a tool set for  
903 whole-genome association and population-based linkage analyses. *Am Journal*  
904 *Hum Genet* 81: 559-575. doi: 10.1086/519795
- 905 R Core Team. 2014. R version 3.6.1: A language and environment for statistical  
906 computing. In *R Foundation for Statistical Computing*. Vienna, Austria.
- 907 Ruiz-Sanchez E, Rodriguez-Gomez F, Sosa V. 2012. Refugia and geographic barriers  
908 of populations of the desert poppy, *Hunnemannia fumariifolia* (Papaveraceae).  
909 *Organisms Diversity & Evolution* 12:133-143. doi: 10.1007/s13127-012-0089-z
- 910 Reaz R, Bayzid MS, Rahman MS. 2014. Accurate Phylogenetic Tree Reconstruction

- 911 from Quartets: A Heuristic Approach. *PLoS ONE* 9: e104008. doi:10.  
912 1371/journal.pone.0104008
- 913 Ren Y, Wang ML, Hu ZH. 1998. Kingdonia, embryology and its systematic  
914 significance. *Acta Phytotaxonomica Sinica* 36: 423-427.
- 915 Ren Y, Li Z, Lei Y. 2003. Achene and seed abortion contribute to the rarity of  
916 *Kingdonia uniflora*. *Isr J Plant Sci* 51: 39-44. doi: 10.1560/y466-dtln-5qf2-d4yh
- 917 Schön I, Rossetti G, Martens K. 2009. Darwinulid ostracods: ancient asexual scandals  
918 or scandalous gossip? *Lost Sex* 217–240. doi: 10.1007/978-90-481-2770-2\_11
- 919 Schurko AM, Neiman M, Logsdon JM, Jr.. 2009. Signs of sex: what we know and  
920 how we know it. *Trends Ecol Evol* 24: 208-217. doi: 10.1016/j.tree.2008.11.010
- 921 Schwander T. 2016. Evolution: the end of an ancient asexual scandal. *Curr Biol* 26:  
922 R233-235. doi: 10.1016/j.cub.2016.01.034
- 923 Signorovitch A, Hur J, Gladyshev E, Meselson M. 2015. Allele sharing and evidence  
924 for sexuality in a mitochondrial clade of bdelloid rotifers. *Genetics* 200: 581-590.  
925 doi: 10.1534/genetics.115.176719
- 926 Simko I, Haynes KG, Jones RW. 2006. Assessment of linkage disequilibrium in  
927 potato genome with single nucleotide polymorphism markers. *Genetics* 173:  
928 2237-2245. doi: 10.1534/genetics.106.060905
- 929 Siol M, Bonnin I, Olivieri I, Prosperi JM, Ronfort J. 2007. Effective population size  
930 associated with self-fertilization: lessons from temporal changes in allele  
931 frequencies in the selfing annual *Medicago truncatula*. *J Evolution Biol* 20:  
932 2349-2360. doi: 10.1111/j.1420-9101.2007.01409.x

- 933 Strand AE, Williams LM, Oleksiak MF, Sotka EE. 2012. Can diversifying selection be  
934 distinguished from history in geographic clines? A population genomic study of  
935 killifish (*Fundulus heteroclitus*). *PLoS One* 7: e45138. doi:  
936 10.1371/journal.pone.0045138
- 937 Sun Y, Deng T, Zhang A, Moore MJ, Landis JB, Lin N, Zhang H, Zhang X, Huang J,  
938 Zhang X, Sun H, et al. 2020. Genome Sequencing of the Endangered *Kingdonia*  
939 *uniflora* (Circaceasteraceae, Ranunculales) Reveals Potential Mechanisms of  
940 Evolutionary Specialization. *iScience* 23: 101124. doi:  
941 10.1186/s12864-017-3956-3
- 942 Tian S, Lopez-Pujol J, Wang HW, Ge S, Zhang ZY. 2010. Molecular evidence for  
943 glacial expansion and interglacial retreat during Quaternary climatic changes in a  
944 montane temperate pine (*Pinus kwangtungensis* Chun ex Tsiang) in southern  
945 China. *Plant Syst Evol* 284: 219–229. doi: 10.1007/s00606-009-0246-9
- 946 Tian T, Liu Y, Yan H, You Q, Yi X, Du Z, Su Z. 2017. agrigo v2.0: A GO analysis  
947 toolkit for the agricultural community, 2017 update. *Nucleic Acids Res* 45:  
948 W122–W129. doi: 10.1093/nar/gkx382
- 949 Vakhrusheva OA, Mnatsakanova EA, Galimov YR, Neretina TV, Gerasimov ES,  
950 Naumenko SA, Ozerova SG, Zalevsky AO, Yushenova IA, Rodriguez F, et al.  
951 2020. Genomic signatures of recombination in a natural population of the  
952 bdelloid rotifer *Adineta vaga*. *Nat Commun* 11: 6421. doi:  
953 10.1038/s41467-020-19614-y
- 954 Weir B, Cockerham C. 1984. Estimating F-statistics for the analysis of population

- 955 structure. *Evolution* 38: 1358–1370. doi: 10.1111/j.1558-5646.1984.tb05657.x
- 956 Xu J, Cao B, Bai C. 2015. Prediction of potential suitable distribution of endangered  
957 plant *Kingdonia uniflora* in China with MaxEnt. *Chinese Journal of Ecology* 34:  
958 3354-3359.
- 959 Zhang C, Dong SS, Xu JY, He WM, Yang TL. 2019. PopLDdecay: a fast and effective  
960 tool for linkage disequilibrium decay analysis based on variant call format files.  
961 *Bioinformatics* 35: 1786-1788. doi: 10.1093/bioinformatics/bty875
- 962 Zhang X, Sun Y, Landis JB, Zhang J, Yang L, Lin N, Zhang H, Guo R, Li L, Zhang Y,  
963 et al. 2020. Genomic insights into adaptation to heterogeneous environments for  
964 the ancient relictual *Circaeaster agrestis* (Circaeasteraceae, Ranunculales). *New*  
965 *Phytol* 228: 285-301. doi: 10.1111/nph.16669
- 966 Zheng B, Xu Q, Shen Y. 2002. The relationship between climate change and  
967 Quaternary glacial cycles on the Qinghai-Tibetan Plateau: review and  
968 speculation. *Quatern Int* 97: 93–101. doi: 10.1016/S1040-6182(02)00054-X
- 969 Zimmer C. 2009. Origins. On the origin of sexual reproduction. *Science* 324:  
970 1254-1256. doi: 10.1126/science.324\_1254
- 971
